# Supplementary material for: Insights into the nucleophilic substitution of pyridine at an unsaturated carbon center
Source: Royal Society of Chemistry journal article supplement (doi:10.1039/d1ra03019a), 2021-01-01
Supplement: d1ra03019a1.pdf [file d1ra03019a1.pdf]

## Supporting Information

### Insights into the Nucleophilic Substitution of pyridine at an Unsaturated Carbon Center

*Pan Du<sup>a</sup>, Jiyang Zhao<sup>b,\*</sup>, Shanshan Liu<sup>b</sup>, Zhen Yue<sup>b</sup>*

<sup>a</sup>School of Life Science and Chemistry, Jiangsu Second Normal University, Nanjing  
210013, People's Republic of China.

<sup>b</sup>Nanjing Key Laboratory of Advanced Functional Materials,  
School of Environmental Science, Nanjing Xiaozhuang University, Nanjing 211171,  
People's Republic of China.

jyzhao1981@163.com

## Table of Contents

|                                                                                                                                                                                                                                                                                       |     |
|---------------------------------------------------------------------------------------------------------------------------------------------------------------------------------------------------------------------------------------------------------------------------------------|-----|
| <b>Figure S1.</b> The geometry structures of (a) transition states of pyridine reacting with s1, (b) transition states of pyridine reacting with s7 and (c) tetrahedra intermediates formed from NH <sub>3</sub> and CH <sub>3</sub> FCO calculated by other density functionals..... | s3  |
| <b>Figure S2.</b> The geometry structures of transition states of the substrates (s2-s7) reacting with pyridine. ....                                                                                                                                                                 | s4  |
| <b>Figure S3.</b> The mixing orbitals of transition states of the substrates (s2-s7) reacting with pyridine. ....                                                                                                                                                                     | s5  |
| <b>Figure S4.</b> The potential energy diagrams representing the reaction of acyl fluoride (s1) with different nucleophiles (pyridine, NH <sub>3</sub> , and Cl <sup>-</sup> ).....                                                                                                   | s6  |
| <b>Figure S5.</b> The geometry structures of transition states of the imidoyl substrates (s8-s13) reacting with pyridine. ....                                                                                                                                                        | s7  |
| <b>Figure S6.</b> The mixing orbitals of transition states of the imidoyl substrates (s8-s13) reacting with pyridine. ....                                                                                                                                                            | s8  |
| <b>Figure S7.</b> The profile scans of nucleophile (pyridine or Cl <sup>-</sup> ) approach to CH <sub>3</sub> FC=NOTf (s7).<br>.....                                                                                                                                                  | s9  |
| <b>Table S1.</b> Corrected free energies of all species.....                                                                                                                                                                                                                          | s10 |
| <b>Table S2.</b> Imaginary frequencies of all transition states. ....                                                                                                                                                                                                                 | s11 |
| <b>Table S3.</b> Cartesian coordinates of all species.....                                                                                                                                                                                                                            | s12 |

(a) TS(pyridine+CH<sub>3</sub>ClCO)

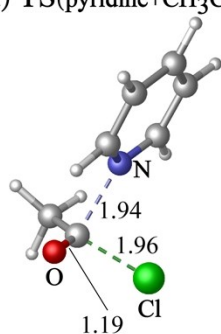

$\Delta G^\ddagger = 13.8$  kcal/mol  
M06-2X

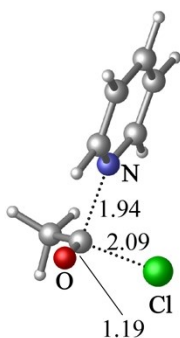

$\Delta G^\ddagger = 15.5$  kcal/mol  
B3LYP-*d3*

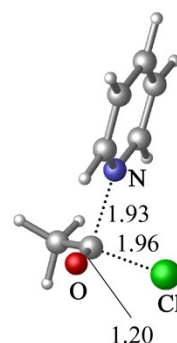

$\Delta G^\ddagger = 13.0$  kcal/mol  
wB97XD

(b) TS(pyridine+s7)

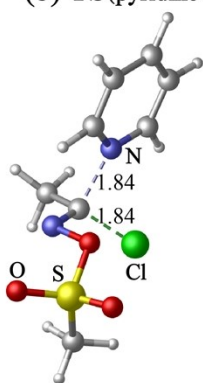

$\Delta G^\ddagger = 22.8$  kcal/mol  
M06-2X

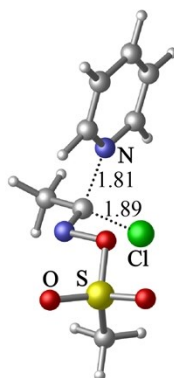

$\Delta G^\ddagger = 24.6$  kcal/mol  
B3LYP-*d3*

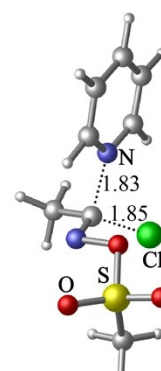

$\Delta G^\ddagger = 23.4$  kcal/mol  
wB97XD

(c) T(NH<sub>3</sub>-CH<sub>3</sub>FCO)

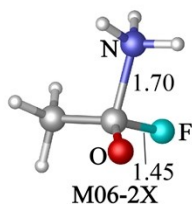

M06-2X

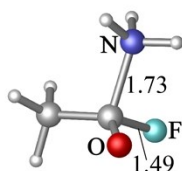

B3LYP

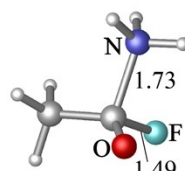

B3LYP-*d3*

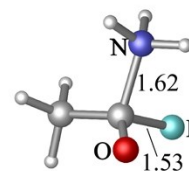

MP2

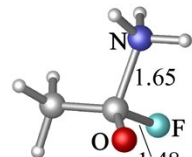

wB97XD

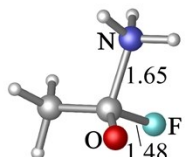

PBE1BE

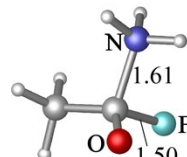

QCISD

**Figure S1.** The geometry structures of (a) transition states of pyridine reacting with s1, (b) transition states of pyridine reacting with s7 and (c) tetrahedral intermediates formed from NH<sub>3</sub> and CH<sub>3</sub>FCO calculated by other density functionals.

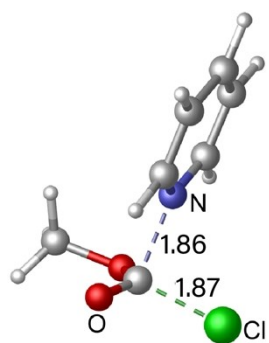

S2

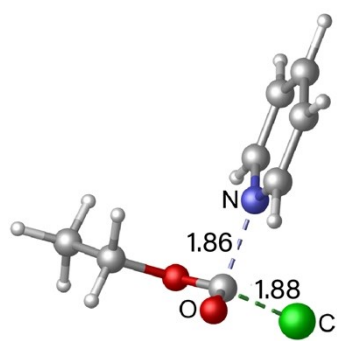

S3

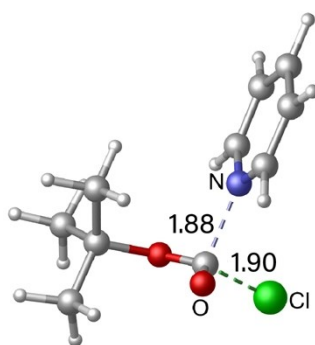

S4

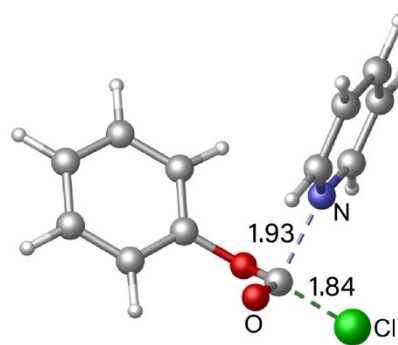

S5

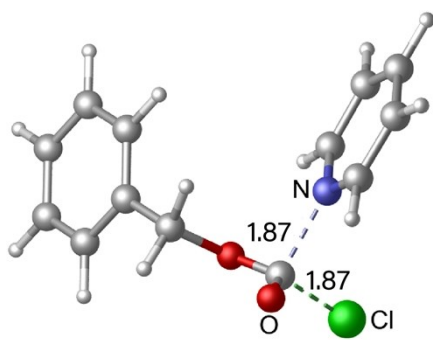

S6

**Figure S2.** The geometry structures of transition states of the substrates (s2-s7) reacting with pyridine.

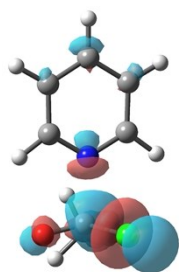

S2

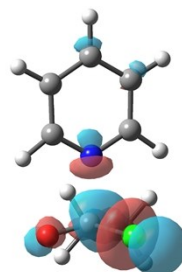

S3

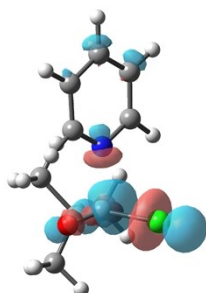

S4

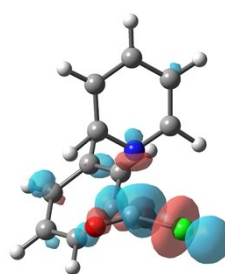

S5

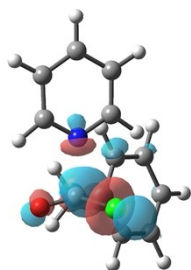

S6

**Figure S3.** The mixing orbitals of transition states of the substrates (s2-s7) reacting with pyridine.

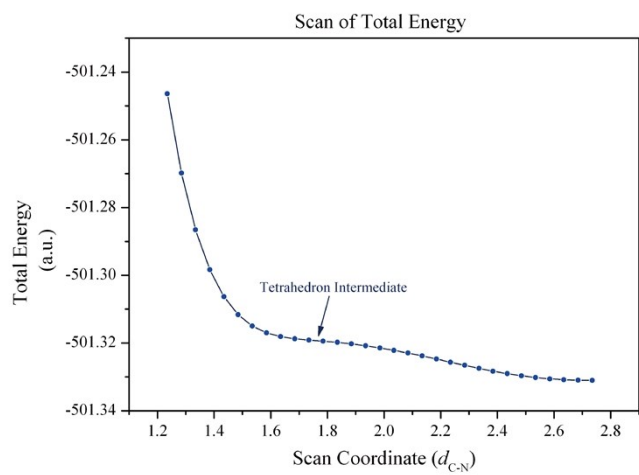

(a)

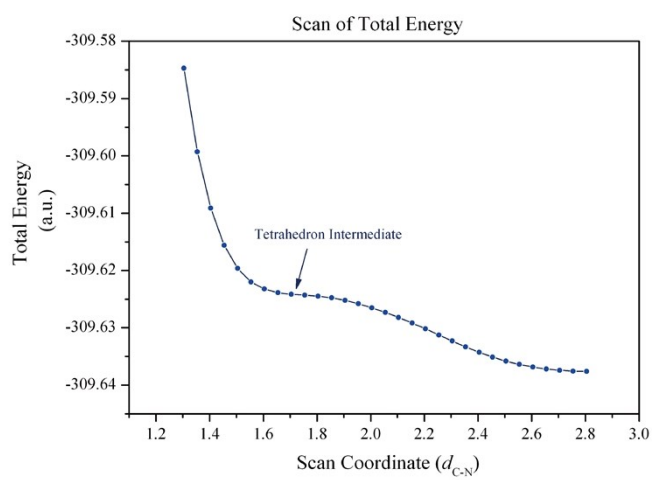

(b)

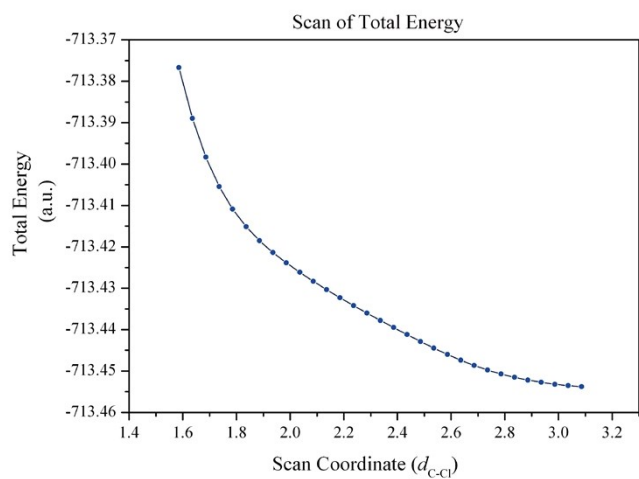

(c)

**Figure S4.** The potential energy diagrams representing the reaction of acyl fluoride (s1) with different nucleophiles (pyridine,  $\text{NH}_3$ , and  $\text{Cl}^-$ )

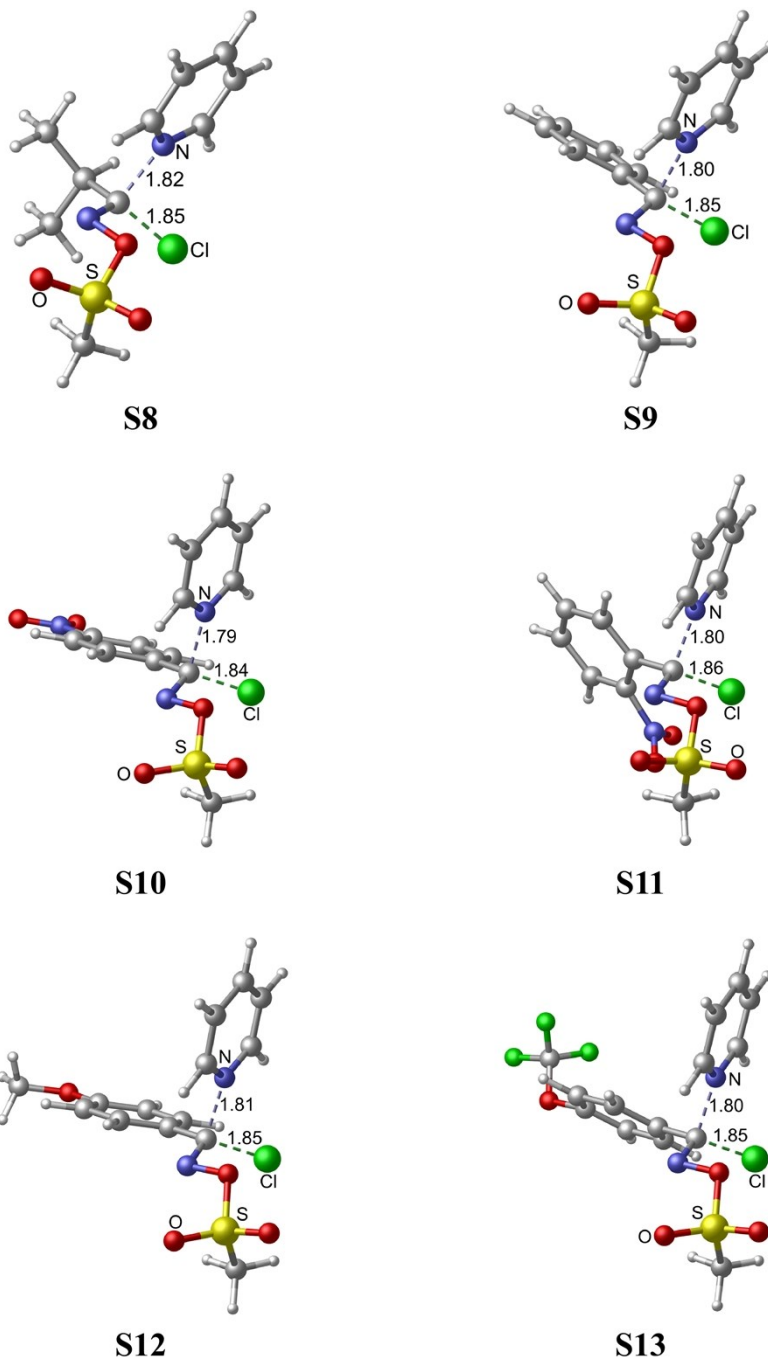

**Figure S5.** The geometry structures of transition states of the imidoyl substrates (s8-s13) reacting with pyridine.

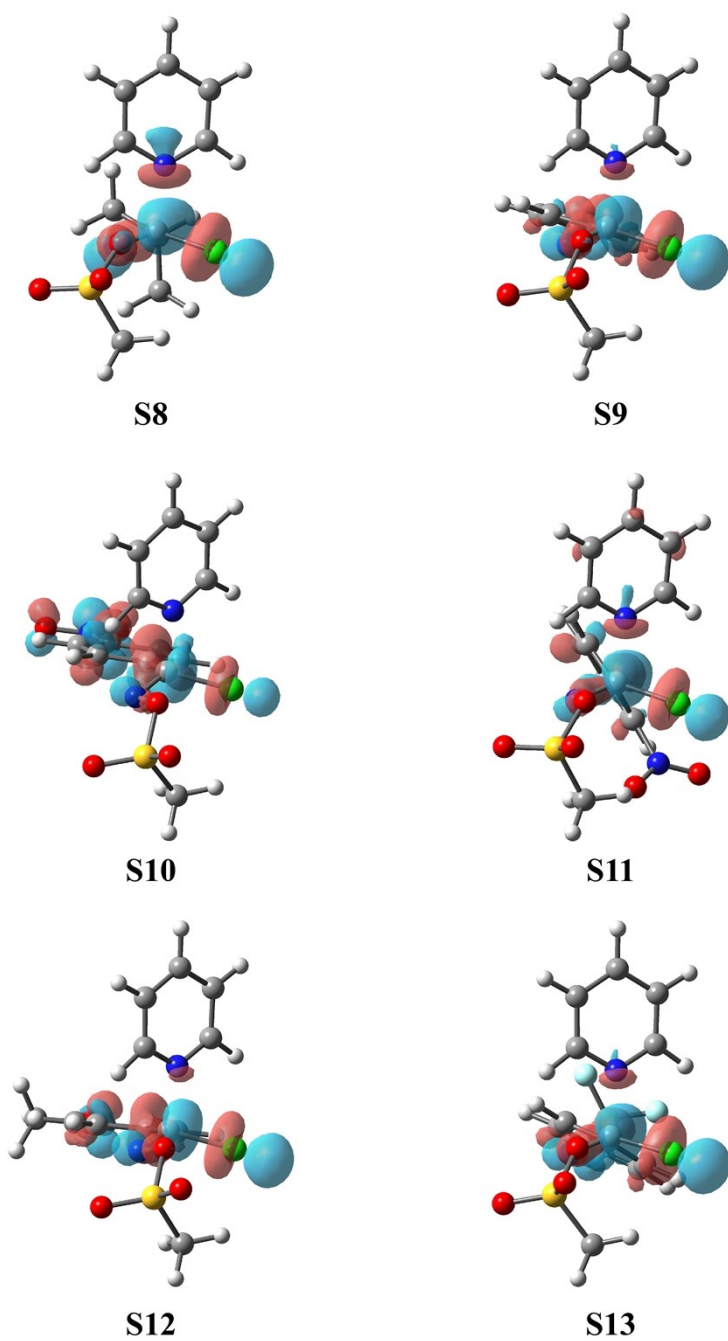

**Figure S6.** The mixing orbitals of transition states of the imidoyl substrates (s8-s13) reacting with pyridine.



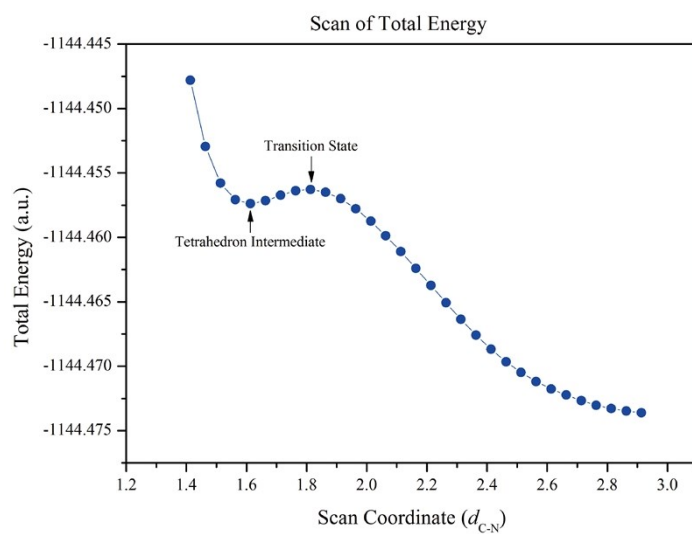

(a)

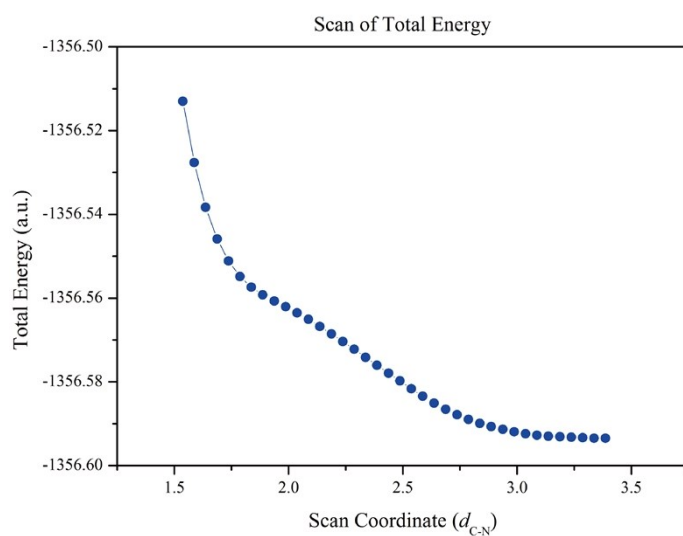

(b)

**Figure S7.** The profile scans of nucleophile (pyridine or  $\text{Cl}^-$ ) approach to

$\text{CH}_3\text{FC}=\text{NOTf}$  (s7).

**Table S1.** Free energies of all species (a.u.).

| Species       | Free energies | Species      | Free energies |
|---------------|---------------|--------------|---------------|
| Cl            | -460.383802   | s9           | -1448.170274  |
| pyridine      | -248.180832   | s9-ts        | -1696.313281  |
| s1            | -613.409228   | s9-ts-p      | -1696.345615  |
| s1Br-ts       | -2975.543871  | s9-ts-r      | -1696.343195  |
| s1Cl-ts       | -1073.767374  | s10          | -1652.662273  |
| s1Cl-ts-sgm   | -1073.76094   | s10-ts       | -1900.805854  |
| s1-ts         | -861.568053   | s10-ts-p     | -1900.836904  |
| s1-ts-p       | -861.582627   | s10-ts-r     | -1900.836189  |
| s1-ts-r       | -861.581646   | s11          | -1652.654173  |
| s1-ts-sigma   | -861.543104   | s11-ts       | -1900.793016  |
| s2            | -688.624292   | s11-ts-p     | -1900.821010  |
| s2-ts         | -936.780512   | s11-ts-r     | -1900.827239  |
| s2-ts-p       | -936.804729   | s12          | -1562.656498  |
| s2-ts-r       | -936.797344   | s12-ts       | -1810.799682  |
| s3            | -727.906730   | s12-ts-p     | -1810.833169  |
| s3-ts         | -976.062437   | s12-ts-r     | -1810.831501  |
| s3-ts-p       | -976.088209   | s13          | -1860.439383  |
| s3-ts-r       | -976.079351   | s13-ts       | -2108.582137  |
| s4            | -806.470158   | s13-ts-p     | -2108.615738  |
| s4-ts         | -1054.624172  | s13-ts-r     | -2108.611775  |
| s4-ts-p       | -1054.650621  | s14          | -538.150208   |
| s4-ts-r       | -1054.641137  | s14-ts       | -786.263421   |
| s5            | -880.284127   | s14-ts-sgm   | -786.255297   |
| s5-ts         | -1128.443643  | s14Cl-ts     | -998.45768    |
| s5-ts-p       | -1128.463958  | s14Cl-ts-sgm | -998.466638   |
| s5-ts-r       | -1128.455625  | s15          | -616.717757   |
| s6            | -919.565582   | s15-ts       | -864.825287   |
| s6-ts         | -1167.722418  | s16          | -1916.963926  |
| s6-ts-p       | -1167.746239  | s16-ts       | -2165.083830  |
| s6-ts-r       | -1167.736780  | d-pyridine   | -248.312009   |
| s7            | -1256.511927  | d-s1         | -613.519492   |
| s7Cl-ts       | -1716.853471  | d-s1-ts      | -861.810765   |
| s7Cl-ts-sigma | -1716.832046  | d-s7         | -1256.768094  |
| s7F           | -896.153860   | d-s7-ts      | -1505.042879  |
| s7-ts         | -1504.656378  | w-pyridine   | -248.198892   |
| s7-ts-p       | -1504.686811  | w-s1         | -613.437474   |
| s7-ts-r       | -1504.683555  | w-s1-ts      | -861.611596   |
| s7-ts-sgm     | -1504.61414   | w-s7         | -1256.570556  |
| s8            | -1335.067915  | w-s7-ts      | -1504.730169  |
| s8-ts         | -1583.210553  | T(Py+s1F)    | -501.21293    |

|         |              |            |              |
|---------|--------------|------------|--------------|
| s8-ts-p | -1583.243336 | T(NH3+s1F) | -309.56656   |
| s8-ts-r | -1583.239846 | T(Py+s7F)  | -1144.303001 |

**Table S2.** Imaginary frequencies of all transition states.

| <b>Species</b>                                    | <b>Imaginary frequency</b> |
|---------------------------------------------------|----------------------------|
| <b>s1-ts</b>                                      | 180.80 cm <sup>-1</sup>    |
| <b>s2-ts</b>                                      | 189.04 cm <sup>-1</sup>    |
| <b>s3-ts</b>                                      | 190.32 cm <sup>-1</sup>    |
| <b>s4-ts</b>                                      | 190.61 cm <sup>-1</sup>    |
| <b>s5-ts</b>                                      | 180.73 cm <sup>-1</sup>    |
| <b>s6-ts</b>                                      | 190.73 cm <sup>-1</sup>    |
| <b>s7-ts</b>                                      | 231.67 cm <sup>-1</sup>    |
| <b>s8-ts</b>                                      | 143.30 cm <sup>-1</sup>    |
| <b>s9-ts</b>                                      | 213.87 cm <sup>-1</sup>    |
| <b>s10-ts</b>                                     | 203.58 cm <sup>-1</sup>    |
| <b>s11-ts</b>                                     | 210.19 cm <sup>-1</sup>    |
| <b>s12-ts</b>                                     | 217.57 cm <sup>-1</sup>    |
| <b>s13-ts</b>                                     | 209.04 cm <sup>-1</sup>    |
| <b>s1-ts-sgm</b>                                  | 181.77 cm <sup>-1</sup>    |
| <b>s1Cl-ts</b>                                    | 264.63 cm <sup>-1</sup>    |
| <b>s1Cl-ts-sgm</b>                                | 75.63 cm <sup>-1</sup>     |
| <b>s1Br-ts</b>                                    | 162.90 cm <sup>-1</sup>    |
| <b>s7-ts-sgm</b>                                  | 232.36 cm <sup>-1</sup>    |
| <b>s7Cl-ts</b>                                    | 237.19 cm <sup>-1</sup>    |
| <b>s7Cl-ts-sgm</b>                                | 186.91 cm <sup>-1</sup>    |
| <b>s14-ts (S<sub>N</sub>V-σ<sub>v</sub>)</b>      | 554.97 cm <sup>-1</sup>    |
| <b>s14-ts-sgm (S<sub>N</sub>V-σ<sub>b</sub>)</b>  | 689.29 cm <sup>-1</sup>    |
| <b>s14Cl-ts (S<sub>N</sub>V-σ<sub>v</sub>)</b>    | 629.94 cm <sup>-1</sup>    |
| <b>s14Cl-ts-sgm(S<sub>N</sub>V-σ<sub>b</sub>)</b> | 687.66 cm <sup>-1</sup>    |
| <b>s15-ts</b>                                     | 571.26 cm <sup>-1</sup>    |
| <b>s16-ts</b>                                     | 385.18 cm <sup>-1</sup>    |

**Table S3.** Cartesian coordinates of all species (angstroms).

|         |           |           |           |            |           |           |           |
|---------|-----------|-----------|-----------|------------|-----------|-----------|-----------|
|         |           |           |           | H          | -2.990543 | 0.822736  | -1.670085 |
| s1      |           |           |           | H          | -2.167624 | -1.454910 | 1.896518  |
| Symbol  | X         | Y         | Z         | O          | 1.469770  | 1.835483  | -0.814975 |
| C       | -0.482976 | 0.237660  | -0.000001 | Cl         | 1.413578  | -1.916105 | -0.789323 |
| O       | -0.821045 | 1.366968  | -0.000381 | C          | 2.070547  | 0.817611  | 1.273436  |
| C       | -1.327001 | -0.993650 | 0.000071  | H          | 3.021904  | 1.317384  | 1.112418  |
| H       | -2.376031 | -0.706607 | -0.001001 | H          | 1.624788  | 1.165163  | 2.207297  |
| H       | -1.087816 | -1.589274 | -0.881582 | H          | 2.224469  | -0.261509 | 1.311808  |
| H       | -1.089245 | -1.587987 | 0.882979  | C          | 1.193546  | 1.155549  | 0.116259  |
| Cl      | 1.290870  | -0.143978 | 0.000317  | H          | 0.132712  | -0.529498 | 1.860908  |
|         |           |           |           |            |           |           |           |
| s1-ts   |           |           |           | s1-ts-r    |           |           |           |
| Symbol  | X         | Y         | Z         | Symbol     | X         | Y         | Z         |
| C       | 1.143514  | 1.136647  | 0.304475  | C          | -1.095632 | 0.859979  | 0.414056  |
| C       | 2.521411  | 1.011564  | 0.424060  | C          | -2.421150 | 1.272369  | 0.327254  |
| C       | 3.108081  | -0.202315 | 0.090680  | C          | -3.375272 | 0.351244  | -0.088916 |
| C       | 2.303318  | -1.251070 | -0.345275 | C          | -2.965269 | -0.939674 | -0.400315 |
| C       | 0.935868  | -1.045167 | -0.433713 | C          | -1.614951 | -1.252505 | -0.280707 |
| N       | 0.387887  | 0.129330  | -0.117939 | N          | -0.690825 | -0.376603 | 0.118208  |
| H       | 4.179964  | -0.333886 | 0.172836  | H          | -4.418225 | 0.633942  | -0.169022 |
| H       | 0.610495  | 2.048846  | 0.553261  | H          | -0.321004 | 1.550258  | 0.736767  |
| H       | 3.111523  | 1.848377  | 0.772385  | H          | -2.691871 | 2.289385  | 0.580442  |
| H       | 2.721875  | -2.213557 | -0.606692 | H          | -3.671079 | -1.691901 | -0.728570 |
| O       | -1.629625 | 1.624758  | 0.318200  | O          | 1.953459  | 0.519250  | 1.487612  |
| Cl      | -2.078754 | -0.972812 | 0.877292  | Cl         | 2.289836  | 0.740631  | -1.080698 |
| C       | -1.788107 | 0.221951  | -1.641866 | C          | 2.175520  | -1.607725 | 0.359997  |
| H       | -2.869039 | 0.277600  | -1.781176 | H          | 3.211787  | -1.858115 | 0.121916  |
| H       | -1.301820 | 0.971965  | -2.266907 | H          | 1.881187  | -2.073850 | 1.298235  |
| H       | -1.446007 | -0.774425 | -1.906955 | H          | 1.536107  | -1.936287 | -0.455812 |
| C       | -1.503596 | 0.560263  | -0.204114 | C          | 2.076099  | -0.126366 | 0.509225  |
| H       | 0.255830  | -1.829705 | -0.745836 | H          | -1.260672 | -2.251848 | -0.515821 |
|         |           |           |           |            |           |           |           |
| s1-ts-p |           |           |           | s1-ts-sigm |           |           |           |
| Symbol  | X         | Y         | Z         | Symbol     | X         | Y         | Z         |
| C       | -1.051972 | 0.999573  | -0.819647 | C          | -1.728636 | -1.099664 | -0.003683 |
| C       | -2.337075 | 0.511339  | -0.867747 | C          | -3.111123 | -1.237254 | -0.016227 |
| C       | -2.759684 | -0.377872 | 0.116581  | C          | -3.891063 | -0.087442 | -0.019027 |
| C       | -1.880127 | -0.757299 | 1.123111  | C          | -3.260020 | 1.150697  | -0.009699 |
| C       | -0.599866 | -0.247654 | 1.121828  | C          | -1.871741 | 1.185702  | 0.001823  |
| N       | -0.215657 | 0.626340  | 0.170627  | N          | -1.115348 | 0.085275  | 0.005166  |
| H       | -3.766325 | -0.776017 | 0.094817  | H          | -4.972117 | -0.154537 | -0.028157 |
| H       | -0.639826 | 1.682989  | -1.547916 | H          | -1.087758 | -1.976416 | -0.000191 |

|    |           |           |           |
|----|-----------|-----------|-----------|
| H  | -3.557650 | -2.222686 | -0.023277 |
| H  | -3.825309 | 2.073226  | -0.010968 |
| O  | 1.362995  | -1.295917 | 0.043795  |
| Cl | 4.291799  | -0.036997 | -0.032982 |
| C  | 1.507191  | 1.246483  | 0.023478  |
| H  | 2.573273  | 1.474028  | 0.042258  |
| H  | 0.996005  | 1.598905  | -0.874112 |
| H  | 1.005250  | 1.616212  | 0.920367  |
| C  | 1.382059  | -0.182993 | 0.046556  |
| H  | -1.348803 | 2.137460  | 0.008931  |

s1Br-ts

| Symbol | X         | Y         | Z         |
|--------|-----------|-----------|-----------|
| C      | -1.727475 | 0.988597  | -0.596756 |
| C      | -3.053061 | 0.615509  | -0.782225 |
| C      | -3.511204 | -0.534112 | -0.151444 |
| C      | -2.633391 | -1.272547 | 0.636604  |
| C      | -1.325595 | -0.829117 | 0.765045  |
| N      | -0.898497 | 0.280320  | 0.161678  |
| H      | -4.538329 | -0.855154 | -0.274469 |
| H      | -1.301178 | 1.870397  | -1.065934 |
| H      | -3.701694 | 1.214365  | -1.407397 |
| H      | -2.949367 | -2.177239 | 1.138562  |
| O      | 0.987453  | 1.935833  | -0.578563 |
| C      | 1.143087  | 1.162055  | 1.715935  |
| H      | 2.186030  | 1.406855  | 1.924991  |
| H      | 0.497035  | 1.968745  | 2.065231  |
| H      | 0.889385  | 0.225455  | 2.202139  |
| C      | 0.999165  | 1.073337  | 0.226149  |
| H      | -0.592909 | -1.375761 | 1.349476  |
| Br     | 1.961586  | -0.749957 | -0.397317 |

s1Cl-ts

| Symbol | X         | Y         | Z         |
|--------|-----------|-----------|-----------|
| O      | -0.000229 | 1.058008  | 1.360088  |
| Cl     | -1.632286 | -0.754093 | -0.049404 |
| C      | -0.000230 | 1.398552  | -1.049686 |
| H      | -0.894686 | 2.023533  | -1.065607 |
| H      | 0.894120  | 2.023682  | -1.065634 |
| H      | -0.000181 | 0.712158  | -1.887944 |
| C      | -0.000148 | 0.660398  | 0.255939  |
| Cl     | 1.632664  | -0.753392 | -0.049359 |

s1Cl-ts-sgm

| Symbol | X         | Y         | Z         |
|--------|-----------|-----------|-----------|
| O      | 0.250297  | -1.331462 | 0.926554  |
| Cl     | -2.843074 | -0.140774 | 0.916311  |
| C      | 0.101096  | 1.203774  | 0.768080  |
| H      | -0.763431 | 1.489895  | 1.365969  |
| H      | 1.057536  | 1.597465  | 1.114819  |
| H      | -0.050479 | 1.468932  | -0.280464 |
| C      | 0.190274  | -0.227415 | 0.813061  |
| Cl     | 2.577752  | 0.060243  | -0.814891 |

s2

| Symbol | X         | Y         | Z         |
|--------|-----------|-----------|-----------|
| C      | -0.030528 | 0.306505  | -0.001253 |
| O      | 0.215694  | 1.467155  | 0.000229  |
| Cl     | -1.690866 | -0.303845 | 0.000276  |
| O      | 0.802214  | -0.703799 | -0.000488 |
| C      | 2.199995  | -0.333349 | 0.000470  |
| H      | 2.422594  | 0.247134  | 0.893738  |
| H      | 2.738172  | -1.274371 | 0.001025  |
| H      | 2.423880  | 0.246821  | -0.892680 |

s2-ts

| Symbol | X         | Y         | Z         |
|--------|-----------|-----------|-----------|
| C      | -1.039635 | 0.193588  | 1.107389  |
| C      | -2.416653 | 0.226505  | 1.254357  |
| C      | -3.211364 | 0.050163  | 0.124932  |
| C      | -2.608879 | -0.149974 | -1.111128 |
| C      | -1.222782 | -0.167079 | -1.177883 |
| N      | -0.481260 | 0.000426  | -0.087984 |
| H      | -4.290887 | 0.069084  | 0.209754  |
| H      | -0.353746 | 0.320132  | 1.937317  |
| H      | -2.851494 | 0.385892  | 2.231677  |
| H      | -3.194518 | -0.289699 | -2.009500 |
| O      | 1.573248  | -0.008400 | -1.502812 |
| Cl     | 1.666113  | -1.685961 | 0.557779  |
| C      | 1.367982  | -0.056694 | -0.316634 |
| O      | 1.735033  | 0.881407  | 0.589171  |
| H      | -0.669347 | -0.312105 | -2.099419 |
| C      | 1.719801  | 2.210976  | 0.056424  |
| H      | 2.010774  | 2.860520  | 0.877329  |
| H      | 2.424706  | 2.296628  | -0.769516 |
| H      | 0.714078  | 2.467103  | -0.286500 |

s2-ts-p

| Symbol | X         | Y         | Z         |
|--------|-----------|-----------|-----------|
| C      | 0.866337  | -0.371524 | -1.026513 |
| C      | 2.181141  | -0.765050 | -1.146788 |
| C      | 3.129778  | -0.240984 | -0.276204 |
| C      | 2.744084  | 0.671990  | 0.702419  |
| C      | 1.422094  | 1.040454  | 0.786413  |
| N      | 0.522747  | 0.528244  | -0.080174 |
| H      | 4.165450  | -0.547184 | -0.353645 |
| H      | 0.063626  | -0.749699 | -1.639349 |
| H      | 2.445293  | -1.487107 | -1.905857 |
| H      | 3.454710  | 1.092921  | 1.398862  |
| O      | -1.236509 | 1.453205  | 1.108773  |
| Cl     | -1.234778 | -2.049367 | 0.755804  |
| C      | -0.888240 | 0.914406  | 0.108204  |
| O      | -1.566490 | 0.642300  | -0.966584 |
| H      | 1.028239  | 1.728958  | 1.520098  |
| C      | -3.000505 | 0.754419  | -0.829121 |
| H      | -3.401259 | 0.480794  | -1.799119 |
| H      | -3.322548 | 0.056153  | -0.057638 |
| H      | -3.262115 | 1.778192  | -0.569332 |

s2-ts-r

| Symbol | X         | Y         | Z         |
|--------|-----------|-----------|-----------|
| C      | 1.538785  | 0.829245  | -0.910644 |
| C      | 2.913903  | 0.638760  | -0.997927 |
| C      | 3.536450  | -0.140841 | -0.029852 |
| C      | 2.760933  | -0.695632 | 0.981254  |
| C      | 1.392531  | -0.444907 | 0.980023  |
| N      | 0.785393  | 0.302845  | 0.056637  |
| H      | 4.605688  | -0.313014 | -0.063508 |
| H      | 1.017847  | 1.431126  | -1.649588 |
| H      | 3.475912  | 1.090766  | -1.805151 |
| H      | 3.200835  | -1.310516 | 1.755948  |
| O      | -1.816699 | -0.237672 | 1.520744  |
| Cl     | -1.954030 | -1.652803 | -0.652540 |
| C      | -1.934887 | -0.192685 | 0.340144  |
| O      | -2.123697 | 0.853773  | -0.425056 |
| H      | 0.749617  | -0.860069 | 1.750836  |
| C      | -1.998758 | 2.118720  | 0.255216  |
| H      | -2.176934 | 2.871486  | -0.506045 |
| H      | -2.739747 | 2.187086  | 1.049981  |
| H      | -0.990588 | 2.196766  | 0.660132  |

s3

| Symbol | X         | Y         | Z         |
|--------|-----------|-----------|-----------|
| C      | -0.612968 | 0.414009  | 0.000350  |
| O      | -0.698902 | 1.597104  | -0.000213 |
| Cl     | -2.039358 | -0.629772 | -0.000454 |
| O      | 0.466064  | -0.328184 | 0.000252  |
| C      | 1.727745  | 0.402441  | 0.000083  |
| H      | 1.746736  | 1.035226  | 0.887809  |
| H      | 1.746546  | 1.035158  | -0.887696 |
| C      | 2.829893  | -0.626911 | 0.000004  |
| H      | 2.769511  | -1.256698 | -0.888056 |
| H      | 3.794559  | -0.117910 | -0.000082 |
| H      | 2.769656  | -1.256673 | 0.888091  |

s3-ts

| Symbol | X         | Y         | Z         |
|--------|-----------|-----------|-----------|
| C      | -1.589197 | -0.368900 | -1.072414 |
| C      | -2.904847 | 0.063070  | -0.980338 |
| C      | -3.292065 | 0.775477  | 0.148125  |
| C      | -2.359238 | 1.035540  | 1.148317  |
| C      | -1.065390 | 0.568382  | 0.985471  |
| N      | -0.714495 | -0.113327 | -0.105446 |
| H      | -4.311685 | 1.126355  | 0.249210  |
| H      | -1.198534 | -0.925347 | -1.917523 |
| H      | -3.602097 | -0.156212 | -1.777389 |
| H      | -2.625606 | 1.588035  | 2.039080  |
| O      | 1.099923  | -1.103936 | -1.496432 |
| Cl     | 0.943333  | -2.106091 | 0.964631  |
| C      | 1.011994  | -0.760042 | -0.344928 |
| O      | 1.710606  | 0.238201  | 0.242218  |
| C      | 1.998707  | 1.336063  | -0.646196 |
| H      | 1.059516  | 1.681222  | -1.090046 |
| H      | 2.648850  | 0.977671  | -1.445677 |
| H      | -0.282069 | 0.727142  | 1.718049  |
| C      | 2.653525  | 2.418049  | 0.180183  |
| H      | 2.895553  | 3.270281  | -0.456671 |
| H      | 1.983465  | 2.755477  | 0.972613  |
| H      | 3.575479  | 2.049930  | 0.632278  |

s3-ts-p

| Symbol | X         | Y         | Z         |
|--------|-----------|-----------|-----------|
| C      | -1.863313 | -0.983794 | 0.737861  |
| C      | -3.153843 | -0.648478 | 0.400776  |
| C      | -3.371369 | 0.175092  | -0.700943 |
| C      | -2.290301 | 0.647048  | -1.436776 |

|    |           |           |           |
|----|-----------|-----------|-----------|
| C  | -1.013467 | 0.290698  | -1.061641 |
| N  | -0.832102 | -0.525295 | -0.001547 |
| H  | -4.380289 | 0.452829  | -0.979234 |
| H  | -1.597007 | -1.604450 | 1.581310  |
| H  | -3.970818 | -1.025599 | 0.998825  |
| H  | -2.424671 | 1.300249  | -2.286880 |
| O  | 0.701743  | -1.340107 | 1.531699  |
| Cl | 0.765059  | 2.117890  | 0.957091  |
| C  | 0.531057  | -0.874706 | 0.451000  |
| O  | 1.379885  | -0.659179 | -0.506404 |
| C  | 2.785419  | -0.692376 | -0.118755 |
| H  | 3.018221  | -1.708833 | 0.198776  |
| H  | 2.890476  | -0.004911 | 0.721525  |
| H  | -0.119077 | 0.635310  | -1.556343 |
| C  | 3.580715  | -0.256636 | -1.322345 |
| H  | 4.641276  | -0.260010 | -1.067052 |
| H  | 3.424310  | -0.935656 | -2.161424 |
| H  | 3.298306  | 0.754181  | -1.618351 |

s3-ts-r

| Symbol | X         | Y         | Z         |
|--------|-----------|-----------|-----------|
| C      | 1.905314  | -0.373348 | 1.255832  |
| C      | 3.253450  | -0.187344 | 0.966290  |
| C      | 3.607674  | 0.194379  | -0.322256 |
| C      | 2.602331  | 0.372802  | -1.265342 |
| C      | 1.283786  | 0.161164  | -0.875840 |
| N      | 0.931753  | -0.203283 | 0.359208  |
| H      | 4.647068  | 0.348968  | -0.586578 |
| H      | 1.592572  | -0.672437 | 2.251506  |
| H      | 4.000651  | -0.339897 | 1.734535  |
| H      | 2.828772  | 0.667487  | -2.282069 |
| O      | -2.005142 | -0.837336 | 1.507294  |
| Cl     | -1.775586 | -1.980824 | -0.816755 |
| C      | -1.869187 | -0.648503 | 0.343757  |
| O      | -1.815368 | 0.488558  | -0.303331 |
| C      | -1.737797 | 1.669128  | 0.541564  |
| H      | -0.914540 | 1.512887  | 1.239342  |
| H      | -2.674007 | 1.749602  | 1.095368  |
| H      | 0.469377  | 0.287941  | -1.583794 |
| C      | -1.501048 | 2.846627  | -0.371237 |
| H      | -1.444434 | 3.758200  | 0.225405  |
| H      | -0.561231 | 2.727690  | -0.912472 |
| H      | -2.314947 | 2.952275  | -1.089465 |

s4

| Symbol | X         | Y         | Z         |
|--------|-----------|-----------|-----------|
| C      | -1.015480 | 0.339521  | 0.002289  |
| O      | -0.966301 | 1.526565  | 0.000761  |
| Cl     | -2.576447 | -0.507825 | -0.004274 |
| O      | -0.058477 | -0.545998 | 0.000465  |
| C      | 1.367942  | -0.112763 | 0.000251  |
| C      | 2.104038  | -1.441996 | -0.002594 |
| H      | 1.847317  | -2.019225 | -0.892253 |
| H      | 3.179490  | -1.257353 | -0.002808 |
| H      | 1.848217  | -2.022544 | 0.885158  |
| C      | 1.651700  | 0.678728  | -1.267303 |
| H      | 1.142889  | 1.641618  | -1.266847 |
| H      | 2.727176  | 0.856992  | -1.329323 |
| H      | 1.348666  | 0.107632  | -2.147106 |
| C      | 1.653564  | 0.674241  | 1.270166  |
| H      | 1.352155  | 0.099875  | 2.148408  |
| H      | 2.729128  | 0.852394  | 1.330975  |
| H      | 1.144583  | 1.637014  | 1.274090  |

s4-ts

| Symbol | X         | Y         | Z         |
|--------|-----------|-----------|-----------|
| C      | -1.888417 | 0.095379  | 1.150387  |
| C      | -3.135152 | -0.512840 | 1.094963  |
| C      | -3.554438 | -1.056426 | -0.113130 |
| C      | -2.722313 | -0.975524 | -1.226494 |
| C      | -1.493349 | -0.350308 | -1.090628 |
| N      | -1.108490 | 0.161516  | 0.077912  |
| H      | -4.520651 | -1.539955 | -0.188532 |
| H      | -1.478523 | 0.537194  | 2.052686  |
| H      | -3.754968 | -0.557011 | 1.980162  |
| H      | -3.016256 | -1.388320 | -2.182036 |
| O      | 0.726841  | 1.128188  | 1.479677  |
| Cl     | 0.160450  | 2.533486  | -0.717397 |
| C      | 0.570159  | 0.975844  | 0.297307  |
| O      | 1.302421  | 0.231215  | -0.547316 |
| C      | 2.068283  | -0.907611 | -0.016853 |
| H      | -0.787061 | -0.250643 | -1.907494 |
| C      | 2.570560  | -1.581949 | -1.285500 |
| H      | 3.170399  | -2.455964 | -1.025166 |
| H      | 1.729456  | -1.904135 | -1.902791 |
| H      | 3.188247  | -0.891739 | -1.862872 |
| C      | 1.171311  | -1.854241 | 0.774205  |
| H      | 0.765937  | -1.372148 | 1.664185  |

|   |          |           |          |
|---|----------|-----------|----------|
| H | 0.349059 | -2.220860 | 0.155628 |
| H | 1.768561 | -2.712162 | 1.090218 |
| C | 3.233793 | -0.394619 | 0.820543 |
| H | 3.804630 | 0.343269  | 0.253045 |
| H | 2.888065 | 0.058754  | 1.748012 |
| H | 3.893235 | -1.231670 | 1.061206 |

s4-ts-p

| Symbol | X         | Y         | Z         |
|--------|-----------|-----------|-----------|
| C      | -2.057161 | -0.890553 | 1.011843  |
| C      | -3.389290 | -0.852901 | 0.671931  |
| C      | -3.746182 | -0.481762 | -0.621837 |
| C      | -2.758630 | -0.151412 | -1.541752 |
| C      | -1.437052 | -0.191992 | -1.153937 |
| N      | -1.116526 | -0.578865 | 0.097377  |
| H      | -4.789891 | -0.443168 | -0.907222 |
| H      | -1.688059 | -1.153754 | 1.992391  |
| H      | -4.131203 | -1.106085 | 1.415411  |
| H      | -3.000641 | 0.156830  | -2.548618 |
| O      | 0.530813  | -0.749309 | 1.713382  |
| Cl     | -0.565961 | 2.506005  | 0.334045  |
| C      | 0.295481  | -0.570548 | 0.560894  |
| O      | 1.077474  | -0.411705 | -0.456328 |
| C      | 2.554485  | -0.276467 | -0.275462 |
| H      | -0.614412 | 0.078511  | -1.796484 |
| C      | 3.014303  | 0.068865  | -1.681048 |
| H      | 4.101285  | 0.162121  | -1.689689 |
| H      | 2.724879  | -0.714784 | -2.383345 |
| H      | 2.577793  | 1.016955  | -2.000054 |
| C      | 3.102065  | -1.617316 | 0.185823  |
| H      | 2.732972  | -1.878289 | 1.177391  |
| H      | 2.836398  | -2.404704 | -0.522138 |
| H      | 4.190731  | -1.548405 | 0.232008  |
| C      | 2.844174  | 0.856407  | 0.696431  |
| H      | 2.268733  | 1.742366  | 0.422501  |
| H      | 2.605931  | 0.581308  | 1.722735  |
| H      | 3.909119  | 1.089306  | 0.636190  |

s4-ts-r

| Symbol | X         | Y         | Z         |
|--------|-----------|-----------|-----------|
| C      | -2.068093 | 0.087234  | 1.062490  |
| C      | -3.368121 | -0.385413 | 1.216497  |
| C      | -4.072538 | -0.766509 | 0.080519  |
| C      | -3.450345 | -0.658584 | -1.157971 |

|    |           |           |           |
|----|-----------|-----------|-----------|
| C  | -2.147236 | -0.172708 | -1.204300 |
| N  | -1.461536 | 0.193614  | -0.120228 |
| H  | -5.086677 | -1.140271 | 0.158595  |
| H  | -1.481069 | 0.392101  | 1.924116  |
| H  | -3.810848 | -0.450496 | 2.202292  |
| H  | -3.958569 | -0.942629 | -2.070687 |
| O  | 1.009758  | 1.020369  | 1.473683  |
| Cl | 0.795090  | 2.597126  | -0.580711 |
| C  | 1.168779  | 1.092948  | 0.298908  |
| O  | 1.669175  | 0.234101  | -0.545445 |
| C  | 2.154389  | -1.087352 | -0.069315 |
| H  | -1.629890 | -0.074859 | -2.154327 |
| C  | 2.663805  | -1.723240 | -1.352816 |
| H  | 3.042482  | -2.723066 | -1.134242 |
| H  | 1.856693  | -1.805271 | -2.082735 |
| H  | 3.471818  | -1.127706 | -1.781119 |
| C  | 0.997392  | -1.882484 | 0.514903  |
| H  | 0.592266  | -1.407259 | 1.407693  |
| H  | 0.200178  | -1.991925 | -0.221483 |
| H  | 1.367644  | -2.874567 | 0.783109  |
| C  | 3.287345  | -0.877927 | 0.925865  |
| H  | 4.048105  | -0.219675 | 0.501049  |
| H  | 2.929393  | -0.458209 | 1.864886  |
| H  | 3.748458  | -1.845708 | 1.132935  |

s5

| Symbol | X         | Y         | Z         |
|--------|-----------|-----------|-----------|
| C      | 1.616384  | 0.162062  | 0.305683  |
| O      | 1.379087  | 0.796826  | 1.275317  |
| Cl     | 3.250350  | -0.205493 | -0.215208 |
| O      | 0.762343  | -0.383374 | -0.551077 |
| C      | -0.609457 | -0.185341 | -0.294078 |
| C      | -1.346074 | -1.275546 | 0.131983  |
| C      | -1.176113 | 1.054950  | -0.533515 |
| C      | -2.714246 | -1.111068 | 0.330429  |
| H      | -0.855004 | -2.226078 | 0.298701  |
| C      | -2.543453 | 1.204563  | -0.327666 |
| H      | -0.560710 | 1.879439  | -0.872211 |
| C      | -3.311260 | 0.125087  | 0.102777  |
| H      | -3.310256 | -1.952061 | 0.662429  |
| H      | -3.007823 | 2.166119  | -0.507869 |
| H      | -4.375857 | 0.248071  | 0.258714  |

s5-ts



| Symbol | X         | Y         | Z         |
|--------|-----------|-----------|-----------|
| C      | -1.553376 | -0.785123 | 1.305996  |
| C      | -2.253041 | -1.984692 | 1.337747  |
| C      | -2.778478 | -2.477059 | 0.149906  |
| C      | -2.591276 | -1.761313 | -1.029879 |
| C      | -1.881398 | -0.572744 | -0.976352 |
| N      | -1.384461 | -0.114491 | 0.172572  |
| H      | -3.329020 | -3.409758 | 0.140473  |
| H      | -1.109562 | -0.333291 | 2.187167  |
| H      | -2.377256 | -2.513480 | 2.273036  |
| H      | -2.986371 | -2.113780 | -1.973090 |
| O      | -0.031119 | 1.607529  | 1.447125  |
| Cl     | -1.529736 | 2.651558  | -0.459510 |
| C      | -0.313869 | 1.492484  | 0.288845  |
| O      | 0.556720  | 1.202125  | -0.731203 |
| H      | -1.694828 | 0.036708  | -1.854358 |
| C      | 1.611694  | 0.350260  | -0.403296 |
| C      | 1.641939  | -0.896532 | -1.011320 |
| C      | 2.623864  | 0.769371  | 0.450175  |
| C      | 2.713188  | -1.748154 | -0.755318 |
| H      | 0.840473  | -1.182660 | -1.681735 |
| C      | 3.686533  | -0.092038 | 0.701405  |
| H      | 2.572471  | 1.750319  | 0.903694  |
| C      | 3.733306  | -1.349115 | 0.102604  |
| H      | 2.747987  | -2.721696 | -1.229049 |
| H      | 4.482816  | 0.223470  | 1.364681  |
| H      | 4.565770  | -2.013071 | 0.301167  |

s5-ts-p

| Symbol | X         | Y         | Z         |
|--------|-----------|-----------|-----------|
| C      | 2.558326  | 0.650086  | 1.195580  |
| C      | 3.897729  | 0.686828  | 0.888876  |
| C      | 4.289006  | 0.587338  | -0.443974 |
| C      | 3.328041  | 0.447497  | -1.438571 |
| C      | 1.997167  | 0.405622  | -1.087671 |
| N      | 1.643426  | 0.529018  | 0.209936  |
| H      | 5.339856  | 0.611096  | -0.703629 |
| H      | 2.163165  | 0.706230  | 2.199482  |
| H      | 4.618951  | 0.786814  | 1.687007  |
| H      | 3.598697  | 0.351409  | -2.480094 |
| O      | -0.058573 | 0.304856  | 1.762715  |
| Cl     | 0.868477  | -2.471372 | -0.246426 |
| C      | 0.235312  | 0.427165  | 0.622085  |
| O      | -0.535643 | 0.580816  | -0.429823 |

|   |           |           |           |
|---|-----------|-----------|-----------|
| H | 1.194159  | 0.267254  | -1.794011 |
| C | -1.924056 | 0.398691  | -0.249428 |
| C | -2.737685 | 1.501134  | -0.432501 |
| C | -2.407800 | -0.864714 | 0.041807  |
| C | -4.113912 | 1.325746  | -0.314773 |
| H | -2.301322 | 2.464784  | -0.663463 |
| C | -3.785412 | -1.019059 | 0.159243  |
| H | -1.713545 | -1.689637 | 0.161152  |
| C | -4.635795 | 0.070160  | -0.018303 |
| H | -4.774063 | 2.172610  | -0.455187 |
| H | -4.193235 | -1.996385 | 0.385911  |
| H | -5.707039 | -0.060998 | 0.072417  |

s5-ts-r

| Symbol | X         | Y         | Z         |
|--------|-----------|-----------|-----------|
| C      | -0.442761 | 1.285740  | 1.376958  |
| C      | -1.800853 | 1.572750  | 1.285491  |
| C      | -2.246147 | 2.331014  | 0.209460  |
| C      | -1.317209 | 2.769830  | -0.726332 |
| C      | 0.019665  | 2.429281  | -0.543623 |
| N      | 0.459887  | 1.701783  | 0.484788  |
| H      | -3.296951 | 2.572508  | 0.100153  |
| H      | -0.059553 | 0.684118  | 2.195453  |
| H      | -2.485886 | 1.203878  | 2.038344  |
| H      | -1.615224 | 3.361740  | -1.582514 |
| O      | 1.929169  | -0.836685 | 1.405794  |
| Cl     | 3.542633  | 0.040620  | -0.424587 |
| C      | 2.069661  | -0.646069 | 0.246802  |
| O      | 1.248739  | -0.923474 | -0.756725 |
| H      | 0.770688  | 2.751561  | -1.258817 |
| C      | -0.074078 | -1.316407 | -0.497109 |
| C      | -1.022076 | -0.751980 | -1.336106 |
| C      | -0.407297 | -2.241464 | 0.480748  |
| C      | -2.356072 | -1.103456 | -1.172613 |
| H      | -0.707031 | -0.041392 | -2.089887 |
| C      | -1.749674 | -2.580723 | 0.631840  |
| H      | 0.351358  | -2.681461 | 1.111728  |
| C      | -2.723220 | -2.012767 | -0.184067 |
| H      | -3.107388 | -0.660365 | -1.815006 |
| H      | -2.029633 | -3.297723 | 1.393915  |
| H      | -3.763902 | -2.283189 | -0.054210 |

s6

| Symbol | X | Y | Z |
|--------|---|---|---|
|--------|---|---|---|

|    |           |           |           |
|----|-----------|-----------|-----------|
| C  | -2.367532 | 0.282860  | 0.148574  |
| O  | -2.830379 | 1.225310  | 0.703040  |
| Cl | -3.373361 | -0.962570 | -0.587574 |
| O  | -1.102757 | -0.015340 | -0.029306 |
| C  | -0.158834 | 0.944766  | 0.541051  |
| H  | -0.360197 | 1.010503  | 1.610555  |
| H  | -0.345260 | 1.912438  | 0.075336  |
| C  | 1.219002  | 0.433652  | 0.254201  |
| C  | 1.806563  | -0.505299 | 1.102419  |
| C  | 1.914094  | 0.875104  | -0.870589 |
| C  | 3.075819  | -1.001187 | 0.826277  |
| H  | 1.268146  | -0.845188 | 1.980888  |
| C  | 3.185529  | 0.381626  | -1.147098 |
| H  | 1.459979  | 1.608130  | -1.528814 |
| C  | 3.765989  | -0.557476 | -0.299378 |
| H  | 3.528135  | -1.728672 | 1.489436  |
| H  | 3.722228  | 0.730822  | -2.020953 |
| H  | 4.756777  | -0.940653 | -0.512866 |

s6-ts

| Symbol | X         | Y         | Z         |
|--------|-----------|-----------|-----------|
| C      | -2.878147 | 0.405573  | -0.893548 |
| C      | -3.562505 | 1.612411  | -0.855517 |
| C      | -3.175689 | 2.565549  | 0.078796  |
| C      | -2.122136 | 2.288146  | 0.945704  |
| C      | -1.490706 | 1.058974  | 0.849050  |
| N      | -1.876366 | 0.158824  | -0.056222 |
| H      | -3.689337 | 3.517532  | 0.132433  |
| H      | -3.107098 | -0.391182 | -1.593194 |
| H      | -4.375703 | 1.793856  | -1.545020 |
| H      | -1.794433 | 3.006718  | 1.684647  |
| O      | -1.408021 | -1.984709 | -1.247889 |
| Cl     | -1.693125 | -2.243707 | 1.384140  |
| C      | -1.040610 | -1.501618 | -0.207266 |
| O      | 0.229221  | -1.131692 | 0.090714  |
| C      | 0.960651  | -0.656916 | -1.060930 |
| H      | 0.356639  | 0.097734  | -1.573223 |
| H      | 1.129265  | -1.495506 | -1.738028 |
| H      | -0.664143 | 0.766908  | 1.487457  |
| C      | 2.247007  | -0.070000 | -0.559076 |
| C      | 2.317151  | 1.282209  | -0.224367 |
| C      | 3.372220  | -0.875892 | -0.389218 |
| C      | 3.497405  | 1.824001  | 0.274948  |
| H      | 1.444562  | 1.913088  | -0.362481 |

|   |          |           |           |
|---|----------|-----------|-----------|
| C | 4.553646 | -0.337329 | 0.110854  |
| H | 3.320629 | -1.927564 | -0.650699 |
| C | 4.616811 | 1.013311  | 0.443844  |
| H | 3.545269 | 2.876359  | 0.528473  |
| H | 5.424370 | -0.969422 | 0.238294  |
| H | 5.537558 | 1.433961  | 0.830383  |

s6-ts-p

| Symbol | X         | Y         | Z         |
|--------|-----------|-----------|-----------|
| C      | -3.343541 | -0.857623 | -0.408361 |
| C      | -4.401095 | -0.051501 | -0.758583 |
| C      | -4.154603 | 1.277279  | -1.095097 |
| C      | -2.854347 | 1.768759  | -1.069029 |
| C      | -1.823823 | 0.928582  | -0.708538 |
| N      | -2.089059 | -0.360143 | -0.405670 |
| H      | -4.975343 | 1.927943  | -1.369487 |
| H      | -3.437720 | -1.894810 | -0.120263 |
| H      | -5.400302 | -0.462339 | -0.761393 |
| H      | -2.632314 | 2.798701  | -1.308398 |
| O      | -1.263843 | -2.279949 | 0.595391  |
| Cl     | -0.753743 | 0.707218  | 2.344547  |
| C      | -1.007255 | -1.261561 | 0.039786  |
| O      | 0.141698  | -0.783525 | -0.336052 |
| C      | 1.308419  | -1.399500 | 0.289508  |
| H      | 1.407422  | -2.412309 | -0.100154 |
| H      | 1.103914  | -1.421692 | 1.361239  |
| H      | -0.791796 | 1.233545  | -0.631189 |
| C      | 2.489770  | -0.538777 | -0.038878 |
| C      | 3.510128  | -1.009323 | -0.860828 |
| C      | 2.563140  | 0.750739  | 0.493346  |
| C      | 4.605513  | -0.198035 | -1.149317 |
| H      | 3.451563  | -2.011082 | -1.272860 |
| C      | 3.652145  | 1.561605  | 0.198269  |
| H      | 1.760381  | 1.100050  | 1.136705  |
| C      | 4.675289  | 1.086958  | -0.621991 |
| H      | 5.399968  | -0.569305 | -1.785529 |
| H      | 3.709031  | 2.561174  | 0.612670  |
| H      | 5.526630  | 1.718818  | -0.846253 |

s6-ts-r

| Symbol | X         | Y        | Z         |
|--------|-----------|----------|-----------|
| C      | -1.049399 | 2.343956 | -1.051283 |
| C      | -0.148731 | 3.385817 | -0.850184 |
| C      | 0.505845  | 3.468542 | 0.373791  |

|    |           |           |           |
|----|-----------|-----------|-----------|
| C  | 0.235012  | 2.507850  | 1.340514  |
| C  | -0.676483 | 1.501198  | 1.038046  |
| N  | -1.313202 | 1.412314  | -0.131864 |
| H  | 1.213522  | 4.265610  | 0.569054  |
| H  | -1.579136 | 2.250312  | -1.994450 |
| H  | 0.029401  | 4.109426  | -1.635394 |
| H  | 0.721750  | 2.527199  | 2.307275  |
| O  | -2.673631 | -1.310021 | -1.379636 |
| Cl | -3.118098 | -1.290530 | 1.181638  |
| C  | -2.168088 | -1.348772 | -0.306871 |
| O  | -0.898973 | -1.470805 | -0.001884 |
| C  | 0.009981  | -1.390941 | -1.139582 |
| H  | -0.307641 | -0.553865 | -1.760983 |
| H  | -0.081997 | -2.322227 | -1.700248 |
| H  | -0.899564 | 0.723242  | 1.762284  |
| C  | 1.389658  | -1.185492 | -0.592494 |
| C  | 1.957631  | 0.087322  | -0.588481 |
| C  | 2.105217  | -2.259897 | -0.062353 |
| C  | 3.228376  | 0.287347  | -0.056923 |
| H  | 1.403166  | 0.923795  | -1.002769 |
| C  | 3.373261  | -2.061549 | 0.471976  |
| H  | 1.666267  | -3.252217 | -0.069838 |
| C  | 3.935698  | -0.786487 | 0.475154  |
| H  | 3.663374  | 1.279944  | -0.058101 |
| H  | 3.924657  | -2.899429 | 0.881486  |
| H  | 4.925341  | -0.632496 | 0.888792  |

s7Cl-ts

| Symbol | X         | Y         | Z         |
|--------|-----------|-----------|-----------|
| Cl     | 1.450103  | 1.506835  | -0.758129 |
| C      | 1.442805  | 0.005410  | 0.495510  |
| N      | 0.262056  | -0.365459 | 0.920241  |
| S      | -2.080394 | -0.207157 | -0.020264 |
| O      | -0.561831 | -0.668001 | -0.238617 |
| O      | -2.730271 | -0.536429 | -1.274519 |
| O      | -2.612848 | -0.778381 | 1.201601  |
| C      | -1.961506 | 1.552551  | 0.162479  |
| H      | -2.974360 | 1.916068  | 0.327757  |
| H      | -1.319733 | 1.753676  | 1.017469  |
| H      | -1.533643 | 1.953464  | -0.753364 |
| C      | 2.407964  | 0.347468  | 1.602317  |
| H      | 2.006622  | 1.184452  | 2.174750  |
| H      | 2.526254  | -0.520485 | 2.250546  |
| H      | 3.374447  | 0.622918  | 1.187407  |

|    |          |           |           |
|----|----------|-----------|-----------|
| Cl | 2.370796 | -1.345284 | -0.639268 |
|----|----------|-----------|-----------|

s7Cl-ts-sigma

| Symbol | X         | Y         | Z         |
|--------|-----------|-----------|-----------|
| Cl     | -0.488023 | 3.042927  | -0.253300 |
| C      | 2.462987  | 1.432847  | 0.650578  |
| H      | 1.840683  | 2.303678  | 0.876349  |
| H      | 3.065207  | 1.116220  | 1.500308  |
| H      | 3.105235  | 1.628505  | -0.206347 |
| C      | 1.546977  | 0.368163  | 0.302323  |
| N      | 0.587459  | -0.236106 | 0.118341  |
| S      | -1.903386 | -0.920608 | 0.171455  |
| O      | -0.188565 | -1.213453 | -0.220068 |
| O      | -2.420116 | -2.239340 | -0.032863 |
| O      | -1.891964 | -0.281139 | 1.453060  |
| C      | -2.304908 | 0.192879  | -1.134854 |
| H      | -3.368596 | 0.405055  | -1.022106 |
| H      | -1.703834 | 1.098724  | -0.988665 |
| H      | -2.097190 | -0.321089 | -2.070959 |
| Cl     | 3.504777  | -1.386365 | -0.363433 |

s7F

| Symbol | X         | Y         | Z         |
|--------|-----------|-----------|-----------|
| C      | -2.116767 | 0.007471  | -0.016618 |
| C      | -3.318138 | -0.841181 | 0.149916  |
| H      | -3.020996 | -1.873083 | 0.316923  |
| H      | -3.897718 | -0.477816 | 1.000069  |
| H      | -3.936976 | -0.769949 | -0.745939 |
| N      | -0.936450 | -0.443630 | 0.031527  |
| O      | 0.001053  | 0.583225  | -0.175954 |
| S      | 1.528869  | 0.056982  | 0.135782  |
| O      | 2.322521  | 1.223991  | -0.158205 |
| O      | 1.558949  | -0.532682 | 1.451885  |
| C      | 1.747399  | -1.191444 | -1.100293 |
| H      | 2.750804  | -1.590783 | -0.961165 |
| H      | 0.993917  | -1.958918 | -0.937126 |
| H      | 1.642533  | -0.717842 | -2.073866 |
| F      | -2.359586 | 1.295219  | -0.226584 |

s7

| Symbol | X        | Y         | Z         |
|--------|----------|-----------|-----------|
| C      | 1.845851 | -0.426234 | -0.022152 |
| C      | 2.845519 | -1.527367 | -0.109407 |
| H      | 2.328971 | -2.483287 | -0.168572 |

|    |           |           |           |
|----|-----------|-----------|-----------|
| H  | 3.466170  | -1.384622 | -0.995056 |
| H  | 3.491433  | -1.505826 | 0.769375  |
| Cl | 2.475391  | 1.186839  | 0.075800  |
| N  | 0.606532  | -0.684597 | -0.020280 |
| O  | -0.188586 | 0.459997  | 0.083265  |
| S  | -1.783923 | 0.098077  | -0.138477 |
| O  | -2.415045 | 1.381903  | 0.037078  |
| O  | -1.927294 | -0.623457 | -1.379028 |
| C  | -2.112936 | -0.968366 | 1.235938  |
| H  | -3.164590 | -1.242529 | 1.167413  |
| H  | -1.472453 | -1.842513 | 1.141623  |
| H  | -1.909340 | -0.408963 | 2.146296  |

s7-ts

| Symbol | X         | Y         | Z         |
|--------|-----------|-----------|-----------|
| C      | 2.858274  | 0.578907  | -0.498195 |
| C      | 3.970734  | -0.199897 | -0.764880 |
| C      | 3.977798  | -1.524051 | -0.337872 |
| C      | 2.879002  | -2.023335 | 0.348362  |
| C      | 1.804407  | -1.180940 | 0.588685  |
| N      | 1.811400  | 0.079854  | 0.163806  |
| H      | 4.832389  | -2.157826 | -0.538767 |
| H      | 2.786587  | 1.612053  | -0.814853 |
| H      | 4.808403  | 0.227080  | -1.298766 |
| H      | 2.846211  | -3.046401 | 0.696450  |
| Cl     | 0.101955  | 1.969536  | -0.935287 |
| C      | 0.320443  | 1.041942  | 0.636245  |
| N      | -0.621945 | 0.221038  | 1.023461  |
| S      | -2.666216 | -0.737802 | -0.133616 |
| O      | -1.069994 | -0.528079 | -0.142550 |
| O      | -2.916879 | -1.495153 | -1.339501 |
| O      | -3.088812 | -1.276485 | 1.139714  |
| C      | -3.275863 | 0.916808  | -0.300523 |
| H      | -4.361840 | 0.860071  | -0.259772 |
| H      | -2.880271 | 1.499831  | 0.528572  |
| H      | -2.933363 | 1.305393  | -1.256624 |
| H      | 0.912063  | -1.483966 | 1.125574  |
| C      | 0.847217  | 1.942575  | 1.717418  |
| H      | 0.098188  | 2.701922  | 1.936204  |
| H      | 1.039617  | 1.351480  | 2.611111  |
| H      | 1.765475  | 2.432509  | 1.401010  |

s7-ts-p

| Symbol | X | Y | Z |
|--------|---|---|---|
|--------|---|---|---|

|    |           |           |           |
|----|-----------|-----------|-----------|
| C  | 2.378741  | 0.502302  | -0.336038 |
| C  | 3.336936  | -0.146495 | -1.087390 |
| C  | 3.482652  | -1.522530 | -0.964834 |
| C  | 2.661001  | -2.231877 | -0.091972 |
| C  | 1.713395  | -1.550739 | 0.635008  |
| N  | 1.594629  | -0.210300 | 0.500015  |
| H  | 4.232438  | -2.043599 | -1.546625 |
| H  | 2.162733  | 1.562837  | -0.401569 |
| H  | 3.953201  | 0.432044  | -1.760614 |
| H  | 2.747770  | -3.302250 | 0.027579  |
| Cl | 0.142275  | 2.890806  | -0.894950 |
| C  | 0.591840  | 0.482898  | 1.300215  |
| N  | -0.637364 | 0.219165  | 1.172931  |
| S  | -2.504263 | -0.774509 | -0.208048 |
| O  | -0.882182 | -0.707227 | 0.164253  |
| O  | -2.527464 | -1.781458 | -1.238192 |
| O  | -3.241550 | -0.965519 | 1.015365  |
| C  | -2.769877 | 0.845466  | -0.863534 |
| H  | -3.821518 | 0.896616  | -1.142071 |
| H  | -2.520112 | 1.565680  | -0.086222 |
| H  | -2.110441 | 0.969348  | -1.719826 |
| H  | 1.035181  | -2.024593 | 1.330722  |
| C  | 1.083551  | 1.491898  | 2.272265  |
| H  | 0.239163  | 1.875912  | 2.840002  |
| H  | 1.819079  | 1.043517  | 2.942558  |
| H  | 1.545700  | 2.317453  | 1.726079  |

s7-ts-r

| Symbol | X         | Y         | Z         |
|--------|-----------|-----------|-----------|
| C      | 3.423181  | -0.456701 | 0.525913  |
| C      | 3.354580  | -1.372012 | -0.519413 |
| C      | 2.181804  | -2.098242 | -0.688144 |
| C      | 1.132128  | -1.881409 | 0.196162  |
| C      | 1.303324  | -0.947598 | 1.213547  |
| N      | 2.423564  | -0.238896 | 1.384508  |
| H      | 2.087432  | -2.817827 | -1.492874 |
| H      | 4.323834  | 0.129884  | 0.679693  |
| H      | 4.200600  | -1.504421 | -1.181897 |
| H      | 0.196981  | -2.420546 | 0.110927  |
| Cl     | 1.145309  | 1.474300  | -1.420429 |
| C      | 0.274959  | 1.852239  | 0.029996  |
| N      | -0.822389 | 1.300864  | 0.339995  |
| S      | -2.420820 | -0.611612 | -0.005208 |
| O      | -1.244978 | 0.366713  | -0.613969 |

|   |           |           |           |
|---|-----------|-----------|-----------|
| O | -2.709123 | -1.476750 | -1.121925 |
| O | -1.957421 | -1.168744 | 1.243454  |
| C | -3.744063 | 0.527573  | 0.283061  |
| H | -4.572683 | -0.056442 | 0.680473  |
| H | -3.398700 | 1.263038  | 1.006282  |
| H | -4.003378 | 0.983706  | -0.669805 |
| H | 0.495421  | -0.757346 | 1.912840  |
| C | 0.892600  | 2.865468  | 0.928828  |
| H | 1.051880  | 3.796881  | 0.384438  |
| H | 0.242541  | 3.037441  | 1.784657  |
| H | 1.857403  | 2.482491  | 1.267064  |

s7-ts-sgm

| Symbol | X         | Y         | Z         |
|--------|-----------|-----------|-----------|
| C      | 3.542104  | 0.970475  | 0.502728  |
| C      | 4.812144  | 0.441787  | 0.312120  |
| C      | 4.931969  | -0.772891 | -0.352546 |
| C      | 3.781654  | -1.411675 | -0.799583 |
| C      | 2.553493  | -0.808615 | -0.561196 |
| N      | 2.435639  | 0.358152  | 0.076228  |
| H      | 5.906868  | -1.214463 | -0.519448 |
| H      | 3.408507  | 1.917740  | 1.014911  |
| H      | 5.680021  | 0.974346  | 0.677883  |
| H      | 3.827460  | -2.357596 | -1.322700 |
| Cl     | -2.515965 | 2.660114  | -0.797312 |
| C      | 0.585585  | 2.445504  | 0.665213  |
| H      | -0.375036 | 2.965029  | 0.706016  |
| H      | 1.122930  | 2.508510  | 1.611051  |
| H      | 1.192284  | 2.843208  | -0.147065 |
| C      | 0.268888  | 1.059068  | 0.382314  |
| H      | 1.632290  | -1.275860 | -0.893908 |
| N      | -0.404397 | 0.133932  | 0.227561  |
| S      | -2.478049 | -1.420082 | 0.295467  |
| O      | -0.745090 | -1.092669 | -0.016326 |
| O      | -2.445412 | -2.850877 | 0.293196  |
| O      | -2.793951 | -0.649737 | 1.460589  |
| C      | -3.166531 | -0.735943 | -1.176803 |
| H      | -4.238058 | -0.930738 | -1.117675 |
| H      | -2.957404 | 0.341373  | -1.163334 |
| H      | -2.712649 | -1.257844 | -2.016429 |

s8

| Symbol | X        | Y        | Z         |
|--------|----------|----------|-----------|
| Cl     | 1.613566 | 1.970056 | -0.155271 |

|   |           |           |           |
|---|-----------|-----------|-----------|
| C | 1.363391  | 0.250331  | -0.188553 |
| N | 0.214206  | -0.271744 | -0.102277 |
| S | -2.289661 | -0.057454 | -0.056053 |
| O | -0.809833 | 0.667604  | 0.043644  |
| O | -3.187963 | 1.047844  | 0.165135  |
| O | -2.352656 | -0.815864 | -1.281057 |
| C | -2.260158 | -1.145211 | 1.341102  |
| H | -3.226593 | -1.646548 | 1.360206  |
| H | -1.450705 | -1.856734 | 1.194080  |
| H | -2.113844 | -0.538371 | 2.231967  |
| C | 2.594515  | -0.607003 | -0.313106 |
| H | 3.146004  | -0.211462 | -1.172428 |
| C | 2.240524  | -2.070013 | -0.568902 |
| H | 3.161589  | -2.636948 | -0.711282 |
| H | 1.703591  | -2.492715 | 0.282494  |
| H | 1.618416  | -2.182220 | -1.457094 |
| C | 3.466796  | -0.454956 | 0.940660  |
| H | 4.371278  | -1.053123 | 0.822218  |
| H | 3.760993  | 0.580988  | 1.110137  |
| H | 2.928053  | -0.816073 | 1.820064  |

s8-ts

| Symbol | X         | Y         | Z         |
|--------|-----------|-----------|-----------|
| C      | 2.784017  | -0.030540 | -0.841535 |
| C      | 3.872522  | -0.879465 | -0.765009 |
| C      | 3.816060  | -1.966869 | 0.101657  |
| C      | 2.678121  | -2.163461 | 0.872401  |
| C      | 1.629008  | -1.265822 | 0.758146  |
| N      | 1.698112  | -0.237033 | -0.087767 |
| H      | 4.652341  | -2.650872 | 0.174717  |
| H      | 2.757686  | 0.821312  | -1.508273 |
| H      | 4.741448  | -0.688494 | -1.379371 |
| H      | 2.594154  | -2.994987 | 1.558274  |
| Cl     | 0.133416  | 1.028055  | -1.914412 |
| C      | 0.360442  | 0.847476  | -0.062248 |
| N      | -0.642841 | 0.353612  | 0.636796  |
| S      | -2.751177 | -0.967208 | 0.113285  |
| O      | -1.163328 | -0.805803 | -0.080288 |
| O      | -3.073683 | -2.135008 | -0.682295 |
| O      | -3.078634 | -0.974941 | 1.525110  |
| C      | -3.428521 | 0.492979  | -0.628571 |
| H      | -4.492041 | 0.488413  | -0.395649 |
| H      | -2.930163 | 1.351141  | -0.182523 |
| H      | -3.254017 | 0.436970  | -1.700183 |

|   |           |           |           |
|---|-----------|-----------|-----------|
| H | 0.717232  | -1.330768 | 1.338682  |
| C | 0.929667  | 2.142116  | 0.523767  |
| H | 1.797823  | 2.405906  | -0.087044 |
| C | 1.382968  | 1.953480  | 1.973277  |
| H | 1.809768  | 2.889576  | 2.338619  |
| H | 0.534359  | 1.689236  | 2.605519  |
| H | 2.144868  | 1.177548  | 2.070596  |
| C | -0.099975 | 3.268926  | 0.422731  |
| H | 0.355411  | 4.207145  | 0.745286  |
| H | -0.460704 | 3.395630  | -0.598551 |
| H | -0.951655 | 3.055974  | 1.071537  |

s8-ts-p

| Symbol | X         | Y         | Z         |
|--------|-----------|-----------|-----------|
| C      | -2.087921 | -0.356525 | 1.029619  |
| C      | -2.908430 | -1.389765 | 1.435186  |
| C      | -3.085197 | -2.487073 | 0.601955  |
| C      | -2.431330 | -2.537809 | -0.627184 |
| C      | -1.617120 | -1.491874 | -0.993323 |
| N      | -1.467901 | -0.432815 | -0.166318 |
| H      | -3.728009 | -3.303276 | 0.906624  |
| H      | -1.855105 | 0.519794  | 1.627577  |
| H      | -3.394628 | -1.324175 | 2.398103  |
| H      | -2.546130 | -3.376807 | -1.298406 |
| Cl     | 0.017655  | 1.847112  | 2.420487  |
| C      | -0.618117 | 0.672234  | -0.597636 |
| N      | 0.624983  | 0.506327  | -0.746089 |
| S      | 2.699268  | -0.830251 | -0.234961 |
| O      | 1.041421  | -0.771236 | -0.382099 |
| O      | 2.914087  | -2.203939 | 0.143536  |
| O      | 3.280930  | -0.308951 | -1.446243 |
| C      | 2.956396  | 0.276038  | 1.120078  |
| H      | 4.032029  | 0.317687  | 1.284833  |
| H      | 2.548056  | 1.246772  | 0.842727  |
| H      | 2.425703  | -0.125296 | 1.980609  |
| H      | -1.071518 | -1.451498 | -1.926312 |
| C      | -1.302297 | 1.973756  | -0.884581 |
| H      | -1.841258 | 2.227081  | 0.036401  |
| C      | -2.312129 | 1.796076  | -2.026985 |
| H      | -2.830629 | 2.740567  | -2.195087 |
| H      | -1.798253 | 1.517481  | -2.950314 |
| H      | -3.064847 | 1.037575  | -1.801014 |
| C      | -0.287977 | 3.074717  | -1.170414 |
| H      | -0.818240 | 4.016477  | -1.317397 |

|   |          |          |           |
|---|----------|----------|-----------|
| H | 0.401645 | 3.181217 | -0.332452 |
| H | 0.282677 | 2.852293 | -2.074420 |

s8-ts-r

| Symbol | X         | Y         | Z         |
|--------|-----------|-----------|-----------|
| C      | 3.136343  | -1.341989 | 0.526904  |
| C      | 2.901073  | -2.382126 | -0.366503 |
| C      | 1.624289  | -2.927398 | -0.426624 |
| C      | 0.641353  | -2.414303 | 0.411233  |
| C      | 0.981877  | -1.380146 | 1.277681  |
| N      | 2.203246  | -0.841541 | 1.341146  |
| H      | 1.399217  | -3.734447 | -1.113912 |
| H      | 4.121325  | -0.889288 | 0.590753  |
| H      | 3.700596  | -2.745898 | -0.999410 |
| H      | -0.370544 | -2.799419 | 0.404220  |
| Cl     | 1.159673  | 0.563924  | -1.816849 |
| C      | 0.505698  | 1.287075  | -0.379319 |
| N      | -0.659128 | 1.030592  | 0.043763  |
| S      | -2.664192 | -0.482526 | 0.021408  |
| O      | -1.350180 | 0.122446  | -0.766804 |
| O      | -3.240375 | -1.359701 | -0.967071 |
| O      | -2.237069 | -1.007576 | 1.296918  |
| C      | -3.658693 | 0.962959  | 0.255508  |
| H      | -4.559748 | 0.636231  | 0.772231  |
| H      | -3.089150 | 1.663204  | 0.862637  |
| H      | -3.891335 | 1.369867  | -0.726144 |
| H      | 0.229413  | -0.959459 | 1.937226  |
| C      | 1.397211  | 2.257580  | 0.345474  |
| H      | 2.371583  | 1.763290  | 0.405904  |
| C      | 0.892866  | 2.532846  | 1.759067  |
| H      | 1.602348  | 3.187006  | 2.268363  |
| H      | -0.079998 | 3.027623  | 1.738309  |
| H      | 0.801584  | 1.605138  | 2.325817  |
| C      | 1.538002  | 3.547808  | -0.472820 |
| H      | 2.229780  | 4.221955  | 0.034367  |
| H      | 1.922458  | 3.353179  | -1.474878 |
| H      | 0.570362  | 4.048006  | -0.559045 |

s9

| Symbol | X         | Y         | Z         |
|--------|-----------|-----------|-----------|
| C      | 0.566325  | 0.654094  | -0.074295 |
| Cl     | 0.451351  | 2.372667  | -0.265185 |
| N      | -0.458890 | -0.088485 | 0.021542  |
| O      | -1.655823 | 0.614701  | -0.066766 |

|   |           |           |           |
|---|-----------|-----------|-----------|
| S | -2.949345 | -0.417358 | -0.071958 |
| O | -4.063353 | 0.493487  | -0.142308 |
| O | -2.745786 | -1.407315 | -1.099917 |
| C | -2.829243 | -1.156851 | 1.531758  |
| H | -3.673939 | -1.838442 | 1.619619  |
| H | -1.884442 | -1.693339 | 1.583561  |
| H | -2.887307 | -0.359753 | 2.269649  |
| C | 1.910962  | 0.040074  | -0.033876 |
| C | 2.054027  | -1.300236 | -0.408926 |
| C | 3.024915  | 0.771015  | 0.380589  |
| C | 3.303272  | -1.901785 | -0.357380 |
| H | 1.188638  | -1.855455 | -0.747897 |
| C | 4.272374  | 0.159494  | 0.433148  |
| H | 2.920490  | 1.809620  | 0.667330  |
| C | 4.414012  | -1.174445 | 0.065247  |
| H | 3.411887  | -2.937149 | -0.656043 |
| H | 5.133389  | 0.728800  | 0.760698  |
| H | 5.388723  | -1.645847 | 0.101114  |

s9-ts

| Symbol | X         | Y         | Z         |
|--------|-----------|-----------|-----------|
| C      | 1.814284  | 1.848229  | 0.934796  |
| C      | 2.371655  | 3.094453  | 0.710613  |
| C      | 1.938905  | 3.833001  | -0.386947 |
| C      | 0.974419  | 3.298263  | -1.230805 |
| C      | 0.468438  | 2.037736  | -0.951321 |
| N      | 0.883325  | 1.355267  | 0.113567  |
| H      | 2.354823  | 4.813410  | -0.582919 |
| H      | 2.103140  | 1.222163  | 1.770334  |
| H      | 3.127808  | 3.472167  | 1.385020  |
| H      | 0.614870  | 3.839473  | -2.095084 |
| Cl     | -0.182640 | -0.234193 | 2.080714  |
| C      | 0.218194  | -0.314858 | 0.284507  |
| N      | -0.778373 | -0.498485 | -0.555980 |
| S      | -3.301711 | -0.327550 | -0.308608 |
| O      | -1.862725 | 0.379694  | -0.143736 |
| O      | -4.231523 | 0.681747  | 0.154411  |
| O      | -3.445774 | -0.847759 | -1.651850 |
| C      | -3.220573 | -1.672532 | 0.843601  |
| H      | -4.156256 | -2.220931 | 0.748661  |
| H      | -2.368778 | -2.291893 | 0.569905  |
| H      | -3.104853 | -1.249958 | 1.839065  |
| H      | -0.271776 | 1.541684  | -1.568571 |
| C      | 1.418334  | -1.163527 | -0.041029 |

|   |          |           |           |
|---|----------|-----------|-----------|
| C | 1.827461 | -1.218164 | -1.377685 |
| C | 2.124415 | -1.878074 | 0.923459  |
| C | 2.922092 | -1.989763 | -1.742024 |
| H | 1.280320 | -0.658236 | -2.125900 |
| C | 3.224378 | -2.648542 | 0.552392  |
| H | 1.820679 | -1.844849 | 1.960936  |
| C | 3.625437 | -2.707208 | -0.776428 |
| H | 3.228127 | -2.028770 | -2.780459 |
| H | 3.764678 | -3.203935 | 1.309417  |
| H | 4.481935 | -3.306681 | -1.060702 |

s9-ts-p

| Symbol | X         | Y         | Z         |
|--------|-----------|-----------|-----------|
| C      | 1.143498  | 1.877839  | 0.795979  |
| C      | 1.158995  | 3.246624  | 0.962883  |
| C      | 0.559549  | 4.054594  | 0.004981  |
| C      | -0.046109 | 3.479383  | -1.110439 |
| C      | -0.046202 | 2.110952  | -1.238455 |
| N      | 0.543094  | 1.344980  | -0.290825 |
| H      | 0.565670  | 5.130916  | 0.122294  |
| H      | 1.563716  | 1.173444  | 1.500095  |
| H      | 1.636119  | 3.661779  | 1.838997  |
| H      | -0.514558 | 4.080174  | -1.876567 |
| Cl     | -0.248313 | -0.246332 | 2.752793  |
| C      | 0.535401  | -0.099607 | -0.438433 |
| N      | -0.543118 | -0.748435 | -0.590032 |
| S      | -3.060870 | -0.864941 | -0.498850 |
| O      | -1.668698 | 0.050259  | -0.480644 |
| O      | -4.074066 | 0.141282  | -0.308193 |
| O      | -3.051561 | -1.670519 | -1.694750 |
| C      | -2.844918 | -1.863752 | 0.943064  |
| H      | -3.788718 | -2.386004 | 1.094319  |
| H      | -2.032366 | -2.559224 | 0.742662  |
| H      | -2.591668 | -1.201229 | 1.770441  |
| H      | -0.492124 | 1.585741  | -2.070930 |
| C      | 1.833283  | -0.788440 | -0.402053 |
| C      | 2.979845  | -0.169700 | -0.906285 |
| C      | 1.900847  | -2.074939 | 0.137942  |
| C      | 4.190501  | -0.850869 | -0.888584 |
| H      | 2.929755  | 0.830526  | -1.323043 |
| C      | 3.114236  | -2.747978 | 0.150314  |
| H      | 1.008564  | -2.518841 | 0.560947  |
| C      | 4.257031  | -2.138370 | -0.363422 |
| H      | 5.079600  | -0.376915 | -1.285101 |

|   |          |           |           |
|---|----------|-----------|-----------|
| H | 3.172470 | -3.742571 | 0.574440  |
| H | 5.203589 | -2.664974 | -0.346510 |

s9-ts-r

| Symbol | X         | Y         | Z         |
|--------|-----------|-----------|-----------|
| C      | 1.534149  | 1.970962  | 1.327181  |
| C      | 2.493513  | 2.391314  | 0.410149  |
| C      | 2.070553  | 2.789797  | -0.851240 |
| C      | 0.712144  | 2.742679  | -1.143721 |
| C      | -0.166067 | 2.298777  | -0.159964 |
| N      | 0.227414  | 1.923762  | 1.060710  |
| H      | 2.785726  | 3.121524  | -1.595054 |
| H      | 1.831866  | 1.649135  | 2.321258  |
| H      | 3.541102  | 2.399893  | 0.683952  |
| H      | 0.334708  | 3.035014  | -2.115710 |
| Cl     | 0.077422  | -1.267356 | 2.423536  |
| C      | 0.086492  | -1.088901 | 0.700828  |
| N      | -0.983895 | -0.974842 | 0.028436  |
| S      | -3.451451 | -0.545273 | -0.080181 |
| O      | -2.132173 | -0.978472 | 0.814337  |
| O      | -4.519649 | -0.636852 | 0.882432  |
| O      | -3.169352 | 0.704777  | -0.743712 |
| C      | -3.541871 | -1.860624 | -1.261919 |
| H      | -4.414327 | -1.656952 | -1.880793 |
| H      | -2.628320 | -1.843826 | -1.851907 |
| H      | -3.656359 | -2.792999 | -0.713488 |
| H      | -1.230377 | 2.225893  | -0.362155 |
| C      | 1.389821  | -1.044520 | 0.000869  |
| C      | 1.427872  | -0.603926 | -1.326547 |
| C      | 2.574020  | -1.408095 | 0.644293  |
| C      | 2.639866  | -0.529120 | -1.996978 |
| H      | 0.510612  | -0.303891 | -1.816664 |
| C      | 3.784772  | -1.330430 | -0.034191 |
| H      | 2.555392  | -1.747596 | 1.671515  |
| C      | 3.821333  | -0.888828 | -1.352782 |
| H      | 2.663683  | -0.176208 | -3.021016 |
| H      | 4.699709  | -1.613828 | 0.471393  |
| H      | 4.767250  | -0.823285 | -1.877097 |

T-NH3+s1F

| Symbol | X         | Y         | Z         |
|--------|-----------|-----------|-----------|
| O      | -0.184278 | -0.838029 | 1.181574  |
| C      | -1.191931 | 0.935854  | -0.102464 |
| H      | -2.169374 | 0.455600  | -0.160297 |

|   |           |           |           |
|---|-----------|-----------|-----------|
| H | -1.196840 | 1.638711  | 0.731040  |
| H | -0.999885 | 1.466329  | -1.034654 |
| C | -0.166324 | -0.147724 | 0.162554  |
| F | -0.029897 | -0.897209 | -1.072211 |
| N | 1.341032  | 0.632235  | 0.029821  |
| H | 2.043136  | -0.101848 | 0.111725  |
| H | 1.461422  | 1.280046  | 0.806509  |
| H | 1.484217  | 1.128706  | -0.848299 |

T-py+s1F

| Symbol | X         | Y        | Z         |
|--------|-----------|----------|-----------|
| O      | 1.009964  | 1.225618 | -0.225719 |
| C      | -0.018402 | 3.205422 | -1.123683 |
| H      | -0.996959 | 2.741223 | -1.250616 |
| H      | 0.005346  | 3.728493 | -0.167612 |
| H      | 0.141765  | 3.914139 | -1.934833 |
| C      | 1.002414  | 2.085185 | -1.098492 |
| F      | 1.131069  | 1.597660 | -2.454186 |
| C      | 2.951761  | 3.661998 | -2.106488 |
| C      | 4.167159  | 4.320405 | -2.057838 |
| C      | 4.954108  | 4.188566 | -0.917726 |
| C      | 4.504846  | 3.397162 | 0.132159  |
| C      | 3.275425  | 2.768866 | 0.015220  |
| N      | 2.530583  | 2.916877 | -1.080006 |
| H      | 5.910137  | 4.693079 | -0.853303 |
| H      | 2.306653  | 3.702709 | -2.974817 |
| H      | 4.485876  | 4.915864 | -2.902194 |
| H      | 5.091743  | 3.262982 | 1.030353  |
| H      | 2.844286  | 2.126756 | 0.774112  |

T-py+s7F

| Symbol | X         | Y         | Z         |
|--------|-----------|-----------|-----------|
| C      | 2.477153  | 0.436816  | -0.947282 |
| C      | 3.570254  | -0.391314 | -1.112736 |
| C      | 3.782084  | -1.419277 | -0.199990 |
| C      | 2.895628  | -1.586355 | 0.856553  |
| C      | 1.821420  | -0.724330 | 0.972819  |
| N      | 1.633254  | 0.255204  | 0.080250  |
| H      | 4.630031  | -2.083112 | -0.312437 |
| H      | 2.246780  | 1.248368  | -1.621845 |
| H      | 4.237240  | -0.227823 | -1.947572 |
| H      | 3.023501  | -2.374351 | 1.585276  |
| C      | 0.390634  | 1.240297  | 0.333175  |
| N      | -0.605909 | 0.662393  | 1.027665  |



|   |           |           |           |
|---|-----------|-----------|-----------|
| S | -2.528493 | -0.620704 | -0.077482 |
| O | -0.962609 | -0.530318 | 0.225163  |
| O | -2.661143 | -1.797692 | -0.917371 |
| O | -3.283190 | -0.574896 | 1.160300  |
| C | -2.871541 | 0.841324  | -1.020776 |
| H | -3.934113 | 0.811817  | -1.256235 |
| H | -2.623499 | 1.700909  | -0.403340 |
| H | -2.261835 | 0.810817  | -1.920416 |
| H | 1.076961  | -0.777472 | 1.757060  |
| C | 0.925525  | 2.471794  | 1.026753  |
| H | 0.108797  | 3.180646  | 1.155254  |
| H | 1.335261  | 2.207799  | 2.000752  |
| H | 1.704838  | 2.929905  | 0.417174  |
| F | 0.107901  | 1.568844  | -1.019537 |

w-pyridine2

| Symbol | X         | Y         | Z         |
|--------|-----------|-----------|-----------|
| C      | -1.140532 | -0.718265 | -0.000283 |
| C      | -1.194065 | 0.671326  | 0.000094  |
| C      | 0.001448  | 1.379872  | -0.000085 |
| C      | 1.195291  | 0.669257  | 0.000062  |
| C      | 1.138919  | -0.720658 | -0.000195 |
| N      | -0.001273 | -1.414858 | 0.000156  |
| H      | 0.002171  | 2.463319  | -0.000060 |
| H      | -2.057171 | -1.300135 | 0.000448  |
| H      | -2.149568 | 1.179776  | 0.000346  |
| H      | 2.152094  | 1.175278  | 0.000277  |
| H      | 2.055012  | -1.303421 | 0.000339  |

w-sl

| Symbol | X         | Y         | Z         |
|--------|-----------|-----------|-----------|
| C      | -0.481726 | 0.234427  | 0.003530  |
| O      | -0.823212 | 1.366560  | -0.001480 |
| C      | -1.329064 | -0.991908 | 0.000537  |
| H      | -2.379298 | -0.705382 | -0.002372 |
| H      | -1.094568 | -1.591411 | -0.881066 |
| H      | -1.099449 | -1.591677 | 0.883221  |
| Cl     | 1.292379  | -0.141390 | -0.002540 |

w-sl-ts

| Symbol | X         | Y         | Z         |
|--------|-----------|-----------|-----------|
| C      | -1.139353 | 1.131056  | -0.301250 |
| C      | -2.514496 | 1.012369  | -0.429320 |
| C      | -3.109237 | -0.198255 | -0.101772 |

|    |           |           |           |
|----|-----------|-----------|-----------|
| C  | -2.311861 | -1.249389 | 0.338236  |
| C  | -0.946083 | -1.050250 | 0.436326  |
| N  | -0.389450 | 0.120914  | 0.124053  |
| H  | -4.181452 | -0.324887 | -0.190940 |
| H  | -0.600279 | 2.041133  | -0.544240 |
| H  | -3.098672 | 1.853035  | -0.779519 |
| H  | -2.736332 | -2.210414 | 0.596951  |
| O  | 1.622850  | 1.631814  | -0.259430 |
| Cl | 2.090527  | -0.939842 | -0.911282 |
| C  | 1.791773  | 0.167803  | 1.650766  |
| H  | 2.871792  | 0.242851  | 1.792722  |
| H  | 1.293136  | 0.886190  | 2.303729  |
| H  | 1.474561  | -0.843354 | 1.893337  |
| C  | 1.494387  | 0.544472  | 0.224150  |
| H  | -0.274809 | -1.838647 | 0.755953  |

w-s7

| Symbol | X         | Y         | Z         |
|--------|-----------|-----------|-----------|
| C      | -1.851842 | 0.427728  | -0.025579 |
| C      | -2.843996 | 1.535539  | -0.102566 |
| H      | -2.322729 | 2.489498  | -0.168074 |
| H      | -3.477601 | 1.401899  | -0.981497 |
| H      | -3.481760 | 1.523983  | 0.783464  |
| Cl     | -2.491121 | -1.186575 | 0.076375  |
| N      | -0.610597 | 0.681494  | -0.036287 |
| O      | 0.186166  | -0.461458 | 0.056986  |
| S      | 1.791475  | -0.096211 | -0.138552 |
| O      | 2.411530  | -1.387749 | 0.020535  |
| O      | 1.958908  | 0.650687  | -1.361140 |
| C      | 2.111210  | 0.940388  | 1.263750  |
| H      | 3.164792  | 1.212627  | 1.213238  |
| H      | 1.476966  | 1.821112  | 1.185434  |
| H      | 1.897161  | 0.366045  | 2.162723  |

w-s7-ts

| Symbol | X        | Y         | Z         |
|--------|----------|-----------|-----------|
| C      | 2.859438 | 0.565981  | -0.520198 |
| C      | 3.967461 | -0.216394 | -0.784271 |
| C      | 3.978688 | -1.533171 | -0.338613 |
| C      | 2.885753 | -2.020927 | 0.363796  |
| C      | 1.815152 | -1.176542 | 0.598717  |
| N      | 1.816552 | 0.077841  | 0.155417  |
| H      | 4.831748 | -2.170180 | -0.537067 |
| H      | 2.786961 | 1.594576  | -0.849183 |

|    |           |           |           |
|----|-----------|-----------|-----------|
| H  | 4.801001  | 0.202581  | -1.331410 |
| H  | 2.855869  | -3.038663 | 0.728312  |
| Cl | 0.120018  | 2.008457  | -0.922879 |
| C  | 0.335402  | 1.036524  | 0.635133  |
| N  | -0.620065 | 0.220255  | 1.004057  |
| S  | -2.675288 | -0.741346 | -0.141422 |
| O  | -1.082572 | -0.503934 | -0.175203 |
| O  | -2.933162 | -1.452471 | -1.373823 |
| O  | -3.070351 | -1.337917 | 1.115167  |
| C  | -3.321193 | 0.908014  | -0.230668 |
| H  | -4.406242 | 0.829976  | -0.187212 |
| H  | -2.933772 | 1.463500  | 0.620993  |
| H  | -2.993755 | 1.350944  | -1.168745 |
| H  | 0.925681  | -1.469197 | 1.146061  |
| C  | 0.858109  | 1.911189  | 1.746132  |
| H  | 0.109900  | 2.667326  | 1.985746  |
| H  | 1.046627  | 1.297203  | 2.627254  |
| H  | 1.780713  | 2.409577  | 1.451335  |

d-pyridine

| Symbol | X         | Y         | Z         |
|--------|-----------|-----------|-----------|
| C      | -1.143243 | -0.720428 | 0.000221  |
| C      | -1.196650 | 0.671622  | -0.000038 |
| C      | 0.000406  | 1.382335  | -0.000006 |
| C      | 1.196949  | 0.671162  | -0.000064 |
| C      | 1.142760  | -0.721097 | 0.000096  |
| N      | -0.000283 | -1.417284 | -0.000043 |
| H      | 0.000495  | 2.466018  | -0.000129 |
| H      | -2.060467 | -1.302355 | -0.000137 |
| H      | -2.152812 | 1.180086  | -0.000238 |
| H      | 2.153517  | 1.178859  | -0.000239 |
| H      | 2.059913  | -1.303181 | -0.000202 |

d-s1

| Symbol | X         | Y         | Z         |
|--------|-----------|-----------|-----------|
| C      | -0.497243 | 0.241810  | -0.000342 |
| O      | -0.843538 | 1.369692  | -0.000104 |
| C      | -1.328070 | -1.002235 | -0.000117 |
| H      | -2.381267 | -0.726671 | -0.001125 |
| H      | -1.087523 | -1.600247 | -0.880618 |
| H      | -1.089043 | -1.598560 | 0.881990  |
| Cl     | 1.309295  | -0.145265 | 0.000196  |

d-s1-ts

| Symbol | X         | Y         | Z         |
|--------|-----------|-----------|-----------|
| C      | -1.165478 | 1.139473  | -0.335752 |
| C      | -2.538836 | 0.988528  | -0.484091 |
| C      | -3.120094 | -0.219670 | -0.110915 |
| C      | -2.311660 | -1.237501 | 0.392710  |
| C      | -0.947542 | -1.011032 | 0.507460  |
| N      | -0.407620 | 0.158951  | 0.152197  |
| H      | -4.187518 | -0.369777 | -0.214525 |
| H      | -0.638827 | 2.045845  | -0.612220 |
| H      | -3.130706 | 1.800790  | -0.884138 |
| H      | -2.724972 | -2.193126 | 0.686246  |
| O      | 1.620828  | 1.659828  | -0.285610 |
| Cl     | 2.081530  | -1.010650 | -0.931545 |
| C      | 1.828646  | 0.211497  | 1.650415  |
| H      | 2.913972  | 0.267373  | 1.751110  |
| H      | 1.365235  | 0.933881  | 2.325987  |
| H      | 1.502282  | -0.794518 | 1.894236  |
| C      | 1.481507  | 0.604340  | 0.244627  |
| H      | -0.268788 | -1.771804 | 0.869968  |

d-s7

| Symbol | X         | Y         | Z         |
|--------|-----------|-----------|-----------|
| C      | -1.863491 | 0.435049  | -0.025610 |
| C      | -2.858643 | 1.541801  | -0.108025 |
| H      | -2.339833 | 2.497457  | -0.169413 |
| H      | -3.487571 | 1.407823  | -0.990625 |
| H      | -3.503313 | 1.528613  | 0.773338  |
| Cl     | -2.513498 | -1.188885 | 0.072301  |
| N      | -0.619715 | 0.687458  | -0.027585 |
| O      | 0.181202  | -0.473127 | 0.073261  |
| S      | 1.807158  | -0.098543 | -0.138538 |
| O      | 2.434177  | -1.398244 | 0.030603  |
| O      | 1.967042  | 0.644379  | -1.377861 |
| C      | 2.128912  | 0.959880  | 1.265890  |
| H      | 3.178382  | 1.243879  | 1.202168  |
| H      | 1.480032  | 1.828820  | 1.184110  |
| H      | 1.928293  | 0.385901  | 2.167708  |

d-s7-ts

| Symbol | X        | Y         | Z         |
|--------|----------|-----------|-----------|
| C      | 2.831423 | 0.551022  | -0.535999 |
| C      | 3.930763 | -0.244411 | -0.813881 |
| C      | 3.943419 | -1.559748 | -0.354948 |
| C      | 2.859324 | -2.035054 | 0.375759  |

|    |           |           |           |
|----|-----------|-----------|-----------|
| C  | 1.795682  | -1.182083 | 0.626882  |
| N  | 1.798790  | 0.072095  | 0.168724  |
| H  | 4.788023  | -2.203740 | -0.564581 |
| H  | 2.754286  | 1.573889  | -0.875651 |
| H  | 4.755523  | 0.163673  | -1.381810 |
| H  | 2.830837  | -3.049284 | 0.749537  |
| Cl | 0.126312  | 2.034084  | -0.935204 |
| C  | 0.356470  | 1.039864  | 0.661356  |
| N  | -0.618142 | 0.253212  | 1.041308  |
| S  | -2.666310 | -0.747110 | -0.141498 |
| O  | -1.053372 | -0.528115 | -0.140817 |
| O  | -2.901405 | -1.491731 | -1.371796 |
| O  | -3.103753 | -1.312220 | 1.128115  |
| C  | -3.293628 | 0.919151  | -0.287467 |
| H  | -4.379820 | 0.852450  | -0.263575 |
| H  | -2.913557 | 1.488044  | 0.557420  |
| H  | -2.940058 | 1.332005  | -1.228787 |
| H  | 0.917631  | -1.463328 | 1.193828  |
| C  | 0.888023  | 1.940784  | 1.749447  |
| H  | 0.143302  | 2.703462  | 1.976432  |
| H  | 1.084488  | 1.348896  | 2.643821  |
| H  | 1.807855  | 2.430492  | 1.434680  |

pyridine

| Symbol | X         | Y         | Z         |
|--------|-----------|-----------|-----------|
| C      | -1.140531 | -0.718266 | -0.000283 |
| C      | -1.194065 | 0.671325  | 0.000094  |
| C      | 0.001447  | 1.379872  | -0.000085 |
| C      | 1.195291  | 0.669258  | 0.000062  |
| C      | 1.138920  | -0.720657 | -0.000195 |
| N      | -0.001272 | -1.414858 | 0.000156  |
| H      | 0.002169  | 2.463319  | -0.000060 |
| H      | -2.057170 | -1.300136 | 0.000448  |
| H      | -2.149569 | 1.179775  | 0.000346  |
| H      | 2.152093  | 1.175280  | 0.000277  |
| H      | 2.055013  | -1.303419 | 0.000339  |

s10

| Symbol | X         | Y         | Z         |
|--------|-----------|-----------|-----------|
| C      | -0.528677 | 0.900952  | -0.113493 |
| Cl     | -0.913048 | 2.571468  | -0.331715 |
| N      | -1.414674 | 0.000978  | 0.004414  |
| O      | -2.706861 | 0.490378  | -0.075100 |
| S      | -3.817147 | -0.745653 | -0.039155 |

|   |           |           |           |
|---|-----------|-----------|-----------|
| O | -5.062934 | -0.030866 | -0.137888 |
| O | -3.445499 | -1.720665 | -1.032795 |
| C | -3.575537 | -1.394661 | 1.589783  |
| H | -4.297504 | -2.201224 | 1.708668  |
| H | -2.555951 | -1.768622 | 1.653331  |
| H | -3.761607 | -0.590912 | 2.298753  |
| C | 0.898293  | 0.503329  | -0.073190 |
| C | 1.241729  | -0.805917 | -0.426419 |
| C | 1.883737  | 1.411235  | 0.314909  |
| C | 2.564990  | -1.211551 | -0.381257 |
| H | 0.472245  | -1.496725 | -0.744180 |
| C | 3.212345  | 1.014053  | 0.365670  |
| H | 1.621365  | 2.425704  | 0.583539  |
| C | 3.522912  | -0.289862 | 0.016545  |
| H | 2.854715  | -2.216064 | -0.655986 |
| H | 3.991602  | 1.698982  | 0.668753  |
| N | 4.936274  | -0.715783 | 0.063522  |
| O | 5.190136  | -1.863640 | -0.233256 |
| O | 5.763227  | 0.105488  | 0.397951  |

s10-ts

| Symbol | X         | Y         | Z         |
|--------|-----------|-----------|-----------|
| C      | 0.018210  | 2.700575  | 0.836677  |
| C      | 0.033824  | 4.033454  | 0.467199  |
| C      | -0.530519 | 4.396793  | -0.752113 |
| C      | -1.081430 | 3.416901  | -1.567584 |
| C      | -1.051686 | 2.098629  | -1.139637 |
| N      | -0.520915 | 1.774653  | 0.037896  |
| H      | -0.536090 | 5.433962  | -1.063263 |
| H      | 0.435144  | 2.351558  | 1.773524  |
| H      | 0.479888  | 4.765892  | 1.125769  |
| H      | -1.528165 | 3.658958  | -2.522006 |
| Cl     | -1.052197 | 0.098049  | 2.141802  |
| C      | -0.466078 | 0.015261  | 0.405431  |
| N      | -1.189127 | -0.665476 | -0.459011 |
| S      | -3.550118 | -1.599431 | -0.380914 |
| O      | -2.579183 | -0.316198 | -0.236129 |
| O      | -4.867967 | -1.054598 | -0.131882 |
| O      | -3.292649 | -2.270980 | -1.636650 |
| C      | -3.039489 | -2.635415 | 0.963915  |
| H      | -3.630044 | -3.547409 | 0.896494  |
| H      | -1.978486 | -2.841865 | 0.838390  |
| H      | -3.237397 | -2.099568 | 1.889435  |
| H      | -1.445186 | 1.272611  | -1.721225 |

|   |          |           |           |
|---|----------|-----------|-----------|
| C | 1.005921 | -0.279389 | 0.261402  |
| C | 1.528638 | -0.303661 | -1.036821 |
| C | 1.839614 | -0.514679 | 1.351506  |
| C | 2.870231 | -0.573339 | -1.247573 |
| H | 0.877497 | -0.115278 | -1.880248 |
| C | 3.188719 | -0.784993 | 1.153552  |
| H | 1.448173 | -0.498582 | 2.358531  |
| C | 3.675299 | -0.808306 | -0.141486 |
| H | 3.289117 | -0.599047 | -2.243788 |
| H | 3.848784 | -0.975410 | 1.988174  |
| N | 5.107566 | -1.090908 | -0.354513 |
| O | 5.519245 | -1.099881 | -1.495496 |
| O | 5.795888 | -1.298171 | 0.622662  |

s10-ts-p

| Symbol | X         | Y         | Z         |
|--------|-----------|-----------|-----------|
| C      | -0.390086 | 2.263782  | 0.900933  |
| C      | -0.841704 | 3.551885  | 1.093895  |
| C      | -1.650027 | 4.140819  | 0.129165  |
| C      | -1.994052 | 3.430198  | -1.018970 |
| C      | -1.529049 | 2.146303  | -1.174391 |
| N      | -0.742428 | 1.594693  | -0.219966 |
| H      | -2.010715 | 5.152280  | 0.267156  |
| H      | 0.215115  | 1.716137  | 1.611080  |
| H      | -0.559883 | 4.075860  | 1.995910  |
| H      | -2.616363 | 3.861352  | -1.789816 |
| Cl     | -0.837264 | -0.367580 | 2.739322  |
| C      | -0.265153 | 0.236549  | -0.394110 |
| N      | -1.056690 | -0.734376 | -0.579748 |
| S      | -3.389400 | -1.703375 | -0.559978 |
| O      | -2.382297 | -0.368413 | -0.492315 |
| O      | -4.682793 | -1.094670 | -0.389885 |
| O      | -3.075774 | -2.433153 | -1.762212 |
| C      | -2.882258 | -2.594041 | 0.880015  |
| H      | -3.605275 | -3.398655 | 1.009011  |
| H      | -1.883426 | -2.982340 | 0.692063  |
| H      | -2.873045 | -1.896992 | 1.717468  |
| H      | -1.747225 | 1.527701  | -2.033245 |
| C      | 1.189646  | 0.010170  | -0.335602 |
| C      | 1.657917  | -1.191329 | 0.200822  |
| C      | 2.077319  | 0.978396  | -0.808650 |
| C      | 3.020078  | -1.440780 | 0.240684  |
| H      | 0.951709  | -1.903028 | 0.607455  |
| C      | 3.442972  | 0.738861  | -0.769021 |

|   |          |           |           |
|---|----------|-----------|-----------|
| H | 1.714994 | 1.912584  | -1.221080 |
| C | 3.880683 | -0.468363 | -0.247798 |
| H | 3.412533 | -2.358649 | 0.655229  |
| H | 4.153638 | 1.466091  | -1.135150 |
| N | 5.335586 | -0.727031 | -0.202101 |
| O | 5.704324 | -1.800301 | 0.222776  |
| O | 6.076809 | 0.148559  | -0.594450 |

s10-ts-r

| Symbol | X         | Y         | Z         |
|--------|-----------|-----------|-----------|
| C      | 0.241585  | 2.549789  | 1.176576  |
| C      | 0.969174  | 3.162602  | 0.160925  |
| C      | 0.420042  | 3.198949  | -1.115629 |
| C      | -0.824128 | 2.615167  | -1.321964 |
| C      | -1.467893 | 2.018962  | -0.240891 |
| N      | -0.954645 | 1.985758  | 0.991691  |
| H      | 0.954587  | 3.667260  | -1.934013 |
| H      | 0.641921  | 2.504326  | 2.185277  |
| H      | 1.938258  | 3.597874  | 0.371510  |
| H      | -1.291299 | 2.614000  | -2.298804 |
| Cl     | -0.767344 | -1.179541 | 2.782979  |
| C      | -0.500958 | -1.046456 | 1.081933  |
| N      | -1.408091 | -1.289194 | 0.229283  |
| S      | -3.815876 | -1.702856 | -0.347231 |
| O      | -2.616679 | -1.654319 | 0.798180  |
| O      | -4.960377 | -2.104399 | 0.428308  |
| O      | -3.812459 | -0.448971 | -1.060189 |
| C      | -3.259376 | -3.014418 | -1.397866 |
| H      | -4.014859 | -3.127247 | -2.173917 |
| H      | -2.301614 | -2.720627 | -1.821597 |
| H      | -3.179424 | -3.914081 | -0.791613 |
| H      | -2.430641 | 1.534546  | -0.375033 |
| C      | 0.829966  | -0.604721 | 0.598438  |
| C      | 0.977243  | -0.277154 | -0.754266 |
| C      | 1.908844  | -0.472617 | 1.472975  |
| C      | 2.186837  | 0.200456  | -1.226070 |
| H      | 0.135233  | -0.371873 | -1.426423 |
| C      | 3.129260  | -0.002184 | 1.008612  |
| H      | 1.802980  | -0.723183 | 2.519351  |
| C      | 3.238404  | 0.333611  | -0.330168 |
| H      | 2.313620  | 0.480690  | -2.262566 |
| H      | 3.974963  | 0.112204  | 1.672025  |
| N      | 4.522248  | 0.867310  | -0.823206 |
| O      | 4.569593  | 1.255253  | -1.971728 |

O 5.458608 0.893140 -0.052713

s11

| Symbol | X         | Y         | Z         |
|--------|-----------|-----------|-----------|
| C      | -0.150624 | -0.116814 | -0.544619 |
| Cl     | -0.203031 | -1.341796 | -1.763546 |
| N      | 0.914076  | 0.288662  | 0.004102  |
| O      | 2.043389  | -0.382055 | -0.447472 |
| S      | 3.422332  | 0.261070  | 0.213642  |
| O      | 4.448011  | -0.568513 | -0.363542 |
| O      | 3.415288  | 1.684686  | -0.011437 |
| C      | 3.196742  | -0.097392 | 1.932135  |
| H      | 4.081917  | 0.278580  | 2.443020  |
| H      | 2.300468  | 0.420068  | 2.267190  |
| H      | 3.108433  | -1.176433 | 2.037295  |
| C      | -1.419166 | 0.578103  | -0.215438 |
| C      | -1.506125 | 1.940522  | -0.486277 |
| C      | -2.554735 | -0.061793 | 0.285794  |
| C      | -2.691882 | 2.633170  | -0.257362 |
| C      | -3.746405 | 0.607385  | 0.501519  |
| C      | -3.810868 | 1.969256  | 0.228610  |
| H      | -2.738221 | 3.693761  | -0.469432 |
| H      | -4.596455 | 0.066767  | 0.895168  |
| H      | -4.734176 | 2.506116  | 0.403127  |
| H      | -0.639779 | 2.448450  | -0.890721 |
| N      | -2.499978 | -1.484179 | 0.665508  |
| O      | -1.422955 | -1.934244 | 0.997999  |
| O      | -3.534122 | -2.113842 | 0.644040  |

s11-ts

| Symbol | X         | Y         | Z         |
|--------|-----------|-----------|-----------|
| C      | -1.415343 | 2.265408  | -1.110477 |
| C      | -1.698600 | 3.614035  | -1.225876 |
| C      | -1.012501 | 4.513699  | -0.414692 |
| C      | -0.077486 | 4.036516  | 0.494106  |
| C      | 0.146354  | 2.669777  | 0.566066  |
| N      | -0.509258 | 1.827670  | -0.230461 |
| H      | -1.210100 | 5.575731  | -0.489411 |
| H      | -1.908538 | 1.513206  | -1.714053 |
| H      | -2.441017 | 3.945825  | -1.938572 |
| H      | 0.472842  | 4.702735  | 1.143954  |
| Cl     | 0.136766  | -0.295773 | -1.794297 |
| C      | -0.139745 | 0.074345  | -0.003074 |
| N      | 0.851886  | -0.087162 | 0.838878  |

|   |           |           |           |
|---|-----------|-----------|-----------|
| S | 3.350263  | -0.456932 | 0.506893  |
| O | 2.044735  | 0.452500  | 0.212934  |
| O | 4.410117  | 0.253305  | -0.177747 |
| O | 3.470153  | -0.696167 | 1.929196  |
| C | 2.964521  | -1.971627 | -0.323073 |
| H | 3.775041  | -2.664520 | -0.103296 |
| H | 2.014472  | -2.327505 | 0.070505  |
| H | 2.898695  | -1.758469 | -1.387827 |
| H | 0.840142  | 2.216279  | 1.263934  |
| C | -1.439760 | -0.485171 | 0.532558  |
| C | -2.171427 | 0.259134  | 1.458028  |
| C | -1.967405 | -1.728018 | 0.178767  |
| C | -3.372227 | -0.206986 | 1.981337  |
| C | -3.180282 | -2.196898 | 0.657241  |
| C | -3.889051 | -1.428339 | 1.570349  |
| H | -3.905951 | 0.396082  | 2.704759  |
| H | -3.542641 | -3.162969 | 0.329812  |
| H | -4.830956 | -1.790145 | 1.961839  |
| H | -1.796948 | 1.223438  | 1.774660  |
| O | -1.816613 | -3.116329 | -1.649590 |
| O | -0.122825 | -3.004088 | -0.332731 |
| N | -1.236039 | -2.679676 | -0.681163 |

s11-ts-p

| Symbol | X         | Y         | Z         |
|--------|-----------|-----------|-----------|
| C      | 0.813863  | 2.133340  | 0.972937  |
| C      | 0.693119  | 3.440006  | 1.395208  |
| C      | -0.120690 | 4.311966  | 0.683670  |
| C      | -0.794161 | 3.863068  | -0.450506 |
| C      | -0.650687 | 2.552819  | -0.838760 |
| N      | 0.137756  | 1.716166  | -0.121073 |
| H      | -0.224955 | 5.341029  | 1.003597  |
| H      | 1.411423  | 1.389011  | 1.478437  |
| H      | 1.234371  | 3.756715  | 2.275093  |
| H      | -1.422983 | 4.518436  | -1.035609 |
| Cl     | -0.189938 | -0.372513 | 2.524488  |
| C      | 0.283462  | 0.331906  | -0.550765 |
| N      | -0.714078 | -0.395282 | -0.824059 |
| S      | -3.174078 | -0.903298 | -0.603506 |
| O      | -1.919173 | 0.206915  | -0.534983 |
| O      | -4.304758 | -0.077033 | -0.266886 |
| O      | -3.109937 | -1.565214 | -1.881940 |
| C      | -2.730675 | -1.995461 | 0.710124  |
| H      | -3.538220 | -2.722330 | 0.787468  |

|   |           |           |           |
|---|-----------|-----------|-----------|
| H | -1.784301 | -2.464112 | 0.442566  |
| H | -2.616459 | -1.395524 | 1.611458  |
| H | -1.130915 | 2.133118  | -1.710438 |
| C | 1.685280  | -0.120092 | -0.728411 |
| C | 2.542998  | 0.755183  | -1.402658 |
| C | 2.248486  | -1.290657 | -0.205721 |
| C | 3.887738  | 0.462309  | -1.580112 |
| C | 3.598025  | -1.576046 | -0.343659 |
| C | 4.418750  | -0.704706 | -1.046328 |
| H | 4.517863  | 1.152284  | -2.126164 |
| H | 3.990084  | -2.483432 | 0.096010  |
| H | 5.468569  | -0.938086 | -1.167625 |
| H | 2.145258  | 1.681718  | -1.800502 |
| O | 1.967806  | -2.762071 | 1.530160  |
| O | 0.443188  | -2.709446 | 0.018368  |
| N | 1.474347  | -2.321675 | 0.518165  |

s11-ts-r

| Symbol | X         | Y         | Z         |
|--------|-----------|-----------|-----------|
| C      | -1.767622 | -2.694470 | -1.060704 |
| C      | -3.063768 | -2.458151 | -1.505150 |
| C      | -3.950800 | -1.814001 | -0.650107 |
| C      | -3.503006 | -1.431531 | 0.607662  |
| C      | -2.184534 | -1.709611 | 0.954367  |
| N      | -1.323462 | -2.330098 | 0.145245  |
| H      | -4.968347 | -1.608763 | -0.961041 |
| H      | -1.050768 | -3.194039 | -1.704949 |
| H      | -3.363364 | -2.771309 | -2.497194 |
| H      | -4.147597 | -0.913281 | 1.305987  |
| Cl     | 0.496544  | -0.245012 | -2.008727 |
| C      | 0.722446  | 0.075085  | -0.325056 |
| N      | -0.127979 | 0.653275  | 0.410129  |
| S      | -2.294599 | 1.915353  | 0.663531  |
| O      | -1.281823 | 1.006489  | -0.280987 |
| O      | -3.444666 | 2.070780  | -0.190064 |
| O      | -2.421895 | 1.295971  | 1.959326  |
| C      | -1.378499 | 3.424731  | 0.792922  |
| H      | -1.983619 | 4.105368  | 1.389666  |
| H      | -0.436669 | 3.199427  | 1.289696  |
| H      | -1.225938 | 3.808250  | -0.213518 |
| H      | -1.800301 | -1.395723 | 1.920587  |
| C      | 1.954219  | -0.456807 | 0.308216  |
| C      | 1.812259  | -1.499971 | 1.218745  |
| C      | 3.245884  | -0.020383 | 0.005132  |

|   |          |           |           |
|---|----------|-----------|-----------|
| C | 2.933115 | -2.071764 | 1.815006  |
| C | 4.370289 | -0.589041 | 0.578577  |
| C | 4.207818 | -1.621268 | 1.495435  |
| H | 2.804881 | -2.878669 | 2.525517  |
| H | 5.349499 | -0.211499 | 0.317662  |
| H | 5.079060 | -2.066711 | 1.957923  |
| H | 0.815139 | -1.872177 | 1.420458  |
| O | 4.530828 | 1.198242  | -1.466294 |
| O | 2.543011 | 1.898815  | -1.057801 |
| N | 3.455406 | 1.110864  | -0.915530 |

s12

| Symbol | X         | Y         | Z         |
|--------|-----------|-----------|-----------|
| C      | -0.284354 | 0.901626  | -0.079079 |
| Cl     | -0.708607 | 2.569416  | -0.303987 |
| N      | -1.162506 | -0.010580 | 0.028689  |
| O      | -2.466181 | 0.467721  | -0.093692 |
| S      | -3.554326 | -0.774594 | -0.069464 |
| O      | -4.812140 | -0.080716 | -0.185484 |
| O      | -3.165116 | -1.752453 | -1.055350 |
| C      | -3.331696 | -1.422049 | 1.563195  |
| H      | -4.044551 | -2.238256 | 1.669706  |
| H      | -2.308055 | -1.780754 | 1.644460  |
| H      | -3.540670 | -0.621461 | 2.269374  |
| C      | 1.144271  | 0.548504  | -0.025942 |
| C      | 1.540371  | -0.747360 | -0.360242 |
| C      | 2.115123  | 1.478598  | 0.364842  |
| C      | 2.875192  | -1.123168 | -0.300071 |
| H      | 0.797037  | -1.466034 | -0.681795 |
| C      | 3.445007  | 1.112856  | 0.431554  |
| H      | 1.829178  | 2.490046  | 0.624061  |
| C      | 3.835777  | -0.189818 | 0.100287  |
| H      | 3.152559  | -2.131177 | -0.575011 |
| H      | 4.204503  | 1.821565  | 0.736874  |
| O      | 5.156081  | -0.451125 | 0.188515  |
| C      | 5.603543  | -1.758167 | -0.146240 |
| H      | 5.369833  | -1.994233 | -1.187209 |
| H      | 6.681092  | -1.749156 | -0.006797 |
| H      | 5.153915  | -2.504095 | 0.513577  |

s12-ts

| Symbol | X        | Y        | Z        |
|--------|----------|----------|----------|
| C      | 0.267704 | 2.652391 | 0.805019 |
| C      | 0.347571 | 3.973712 | 0.402618 |

|    |           |           |           |
|----|-----------|-----------|-----------|
| C  | -0.146007 | 4.322324  | -0.851162 |
| C  | -0.691165 | 3.338647  | -1.665726 |
| C  | -0.728647 | 2.032628  | -1.201144 |
| N  | -0.267027 | 1.723047  | 0.008513  |
| H  | -0.100678 | 5.350075  | -1.189246 |
| H  | 0.631169  | 2.314412  | 1.767686  |
| H  | 0.788436  | 4.708414  | 1.062266  |
| H  | -1.082344 | 3.568198  | -2.647321 |
| Cl | -0.913609 | 0.122420  | 2.146674  |
| C  | -0.270991 | -0.033778 | 0.421528  |
| N  | -1.009712 | -0.699941 | -0.441789 |
| S  | -3.431836 | -1.463250 | -0.409347 |
| O  | -2.383280 | -0.246161 | -0.281358 |
| O  | -4.718586 | -0.826586 | -0.216806 |
| O  | -3.191243 | -2.196525 | -1.634363 |
| C  | -3.031391 | -2.486712 | 0.981742  |
| H  | -3.679257 | -3.359566 | 0.922494  |
| H  | -1.982876 | -2.764927 | 0.896985  |
| H  | -3.220375 | -1.909641 | 1.883951  |
| H  | -1.121152 | 1.204536  | -1.780031 |
| C  | 1.186496  | -0.385744 | 0.346169  |
| C  | 1.756078  | -0.549187 | -0.916390 |
| C  | 1.996292  | -0.542252 | 1.473468  |
| C  | 3.098482  | -0.877310 | -1.064662 |
| H  | 1.140770  | -0.423664 | -1.798674 |
| C  | 3.335996  | -0.864772 | 1.337733  |
| H  | 1.583599  | -0.421494 | 2.465949  |
| C  | 3.896912  | -1.036760 | 0.070070  |
| H  | 3.503808  | -1.001446 | -2.059308 |
| H  | 3.967771  | -0.992907 | 2.208013  |
| O  | 5.212769  | -1.350896 | 0.038324  |
| C  | 5.819844  | -1.543940 | -1.230882 |
| H  | 6.859502  | -1.789658 | -1.031134 |
| H  | 5.345402  | -2.368415 | -1.769021 |
| H  | 5.768080  | -0.632162 | -1.831417 |

s12-ts-p

| Symbol | X         | Y        | Z         |
|--------|-----------|----------|-----------|
| C      | -1.384421 | 1.963757 | 0.680888  |
| C      | -1.879029 | 3.252490 | 0.668295  |
| C      | -1.500205 | 4.120448 | -0.347332 |
| C      | -0.619902 | 3.688368 | -1.338268 |
| C      | -0.138484 | 2.402159 | -1.287241 |
| N      | -0.529107 | 1.575292 | -0.289385 |

|    |           |           |           |
|----|-----------|-----------|-----------|
| H  | -1.884582 | 5.132425  | -0.369610 |
| H  | -1.602467 | 1.221209  | 1.446667  |
| H  | -2.553518 | 3.559363  | 1.455012  |
| H  | -0.305083 | 4.338077  | -2.142245 |
| Cl | -1.129980 | -0.376329 | 3.070566  |
| C  | -0.014155 | 0.213456  | -0.292057 |
| N  | -0.795622 | -0.781695 | -0.388859 |
| S  | -3.112339 | -1.746537 | -0.631006 |
| O  | -2.126400 | -0.410191 | -0.496235 |
| O  | -4.421343 | -1.144011 | -0.629705 |
| O  | -2.665807 | -2.514760 | -1.766976 |
| C  | -2.779198 | -2.598198 | 0.880653  |
| H  | -3.496885 | -3.416281 | 0.929116  |
| H  | -1.756482 | -2.965925 | 0.834235  |
| H  | -2.894793 | -1.888616 | 1.699554  |
| H  | 0.551314  | 1.988334  | -2.010242 |
| C  | 1.438294  | 0.047954  | -0.210141 |
| C  | 2.036081  | -1.100966 | -0.728994 |
| C  | 2.235013  | 1.016357  | 0.416454  |
| C  | 3.405759  | -1.292918 | -0.630281 |
| H  | 1.423539  | -1.845808 | -1.221887 |
| C  | 3.598523  | 0.832333  | 0.520404  |
| H  | 1.788624  | 1.906962  | 0.844512  |
| C  | 4.194233  | -0.322659 | -0.002290 |
| H  | 3.845320  | -2.187925 | -1.047364 |
| H  | 4.226767  | 1.565646  | 1.009694  |
| O  | 5.529847  | -0.411260 | 0.140212  |
| C  | 6.184525  | -1.571261 | -0.359321 |
| H  | 7.238123  | -1.439762 | -0.129189 |
| H  | 5.809697  | -2.470908 | 0.134159  |
| H  | 6.052349  | -1.656348 | -1.440547 |

s12-ts-r

| Symbol | X         | Y        | Z         |
|--------|-----------|----------|-----------|
| C      | 0.125476  | 2.415145 | 1.389016  |
| C      | 1.189232  | 2.913257 | 0.640800  |
| C      | 1.042387  | 3.001143 | -0.736931 |
| C      | -0.154113 | 2.579768 | -1.306916 |
| C      | -1.153275 | 2.089118 | -0.472654 |
| N      | -1.028670 | 2.011016 | 0.855801  |
| H      | 1.847461  | 3.380316 | -1.356019 |
| H      | 0.209917  | 2.330292 | 2.468842  |
| H      | 2.104982  | 3.216921 | 1.132480  |
| H      | -0.313012 | 2.620003 | -2.377382 |

|    |           |           |           |
|----|-----------|-----------|-----------|
| Cl | -0.680868 | -0.913804 | 2.723857  |
| C  | -0.331037 | -0.962841 | 1.025778  |
| N  | -1.226650 | -1.224869 | 0.163415  |
| S  | -3.647247 | -1.463029 | -0.446140 |
| O  | -2.486573 | -1.431139 | 0.724148  |
| O  | -4.845654 | -1.718151 | 0.312894  |
| O  | -3.531965 | -0.268924 | -1.248550 |
| C  | -3.179208 | -2.884848 | -1.392013 |
| H  | -3.925607 | -2.989653 | -2.177908 |
| H  | -2.191599 | -2.700000 | -1.808259 |
| H  | -3.185846 | -3.743930 | -0.724804 |
| H  | -2.089968 | 1.727827  | -0.885912 |
| C  | 1.043536  | -0.663579 | 0.585434  |
| C  | 1.293376  | -0.450197 | -0.771383 |
| C  | 2.103936  | -0.554986 | 1.493784  |
| C  | 2.565968  | -0.131766 | -1.223421 |
| H  | 0.478253  | -0.514832 | -1.480936 |
| C  | 3.373669  | -0.236628 | 1.054241  |
| H  | 1.936511  | -0.714157 | 2.550942  |
| C  | 3.613655  | -0.015690 | -0.306484 |
| H  | 2.722514  | 0.039565  | -2.279485 |
| H  | 4.198860  | -0.147100 | 1.749641  |
| O  | 4.882303  | 0.304272  | -0.640208 |
| C  | 5.168574  | 0.556256  | -2.008970 |
| H  | 6.227304  | 0.797014  | -2.053473 |
| H  | 4.967462  | -0.328098 | -2.618487 |
| H  | 4.583722  | 1.402236  | -2.379198 |

s13

| Symbol | X         | Y         | Z         |
|--------|-----------|-----------|-----------|
| C      | -1.237161 | 0.901375  | -0.030226 |
| Cl     | -1.625024 | 2.541796  | -0.422705 |
| N      | -2.121024 | -0.002582 | 0.077888  |
| O      | -3.407663 | 0.456228  | -0.168926 |
| S      | -4.496839 | -0.793217 | -0.150926 |
| O      | -5.740630 | -0.112444 | -0.402956 |
| O      | -4.027999 | -1.822752 | -1.043956 |
| C      | -4.393322 | -1.337542 | 1.530322  |
| H      | -5.112344 | -2.148635 | 1.634978  |
| H      | -3.378715 | -1.687481 | 1.707218  |
| H      | -4.652504 | -0.495802 | 2.168717  |
| C      | 0.183902  | 0.545036  | 0.176907  |
| C      | 0.583626  | -0.780262 | -0.022861 |
| C      | 1.113058  | 1.503070  | 0.582158  |

|   |           |           |           |
|---|-----------|-----------|-----------|
| C | 1.903031  | -1.147286 | 0.190224  |
| H | -0.139330 | -1.515760 | -0.350612 |
| C | 2.435832  | 1.140707  | 0.800488  |
| H | 0.810005  | 2.530064  | 0.737642  |
| C | 2.807057  | -0.177252 | 0.596568  |
| H | 2.235499  | -2.166437 | 0.040204  |
| H | 3.170364  | 1.865712  | 1.126345  |
| O | 4.129350  | -0.556477 | 0.859735  |
| C | 4.990202  | -0.466684 | -0.171966 |
| F | 4.628304  | -1.232630 | -1.205817 |
| F | 6.178811  | -0.866754 | 0.250426  |
| F | 5.104158  | 0.782361  | -0.634479 |

s13-ts

| Symbol | X         | Y         | Z         |
|--------|-----------|-----------|-----------|
| C      | -0.400179 | 2.552909  | 1.018062  |
| C      | -0.315388 | 3.910617  | 0.767271  |
| C      | -0.891381 | 4.412932  | -0.396191 |
| C      | -1.522036 | 3.542714  | -1.275603 |
| C      | -1.559073 | 2.191609  | -0.965335 |
| N      | -1.015837 | 1.734122  | 0.160514  |
| H      | -0.843731 | 5.472385  | -0.614961 |
| H      | 0.023203  | 2.096285  | 1.904613  |
| H      | 0.192120  | 4.555052  | 1.471785  |
| H      | -1.979231 | 3.893880  | -2.190374 |
| Cl     | -1.634222 | -0.077726 | 2.122165  |
| C      | -1.048654 | -0.058149 | 0.381897  |
| N      | -1.807567 | -0.622712 | -0.533515 |
| S      | -4.215224 | -1.433549 | -0.512173 |
| O      | -3.179486 | -0.218484 | -0.276030 |
| O      | -5.502487 | -0.845450 | -0.206361 |
| O      | -4.002265 | -2.014884 | -1.820493 |
| C      | -3.751525 | -2.601083 | 0.738830  |
| H      | -4.385724 | -3.474856 | 0.599384  |
| H      | -2.701953 | -2.846575 | 0.589559  |
| H      | -3.921004 | -2.135421 | 1.706929  |
| H      | -2.015639 | 1.445045  | -1.605053 |
| C      | 0.404171  | -0.418298 | 0.217232  |
| C      | 0.960529  | -0.276837 | -1.057889 |
| C      | 1.186480  | -0.897456 | 1.263904  |
| C      | 2.284601  | -0.617150 | -1.287671 |
| H      | 0.350328  | 0.095031  | -1.871277 |
| C      | 2.516624  | -1.242057 | 1.042421  |
| H      | 0.767873  | -1.016496 | 2.253529  |



|   |          |           |           |
|---|----------|-----------|-----------|
| C | 3.042125 | -1.091103 | -0.227384 |
| H | 2.730274 | -0.520668 | -2.269557 |
| H | 3.135544 | -1.627296 | 1.842566  |
| O | 4.367050 | -1.482591 | -0.471093 |
| C | 5.311773 | -0.554192 | -0.239755 |
| F | 5.346074 | -0.165093 | 1.039938  |
| F | 6.488077 | -1.078477 | -0.546999 |
| F | 5.136093 | 0.549438  | -0.974598 |

s13-ts-p

| Symbol | X         | Y         | Z         |
|--------|-----------|-----------|-----------|
| C      | -0.872244 | 2.227457  | 0.848827  |
| C      | -1.298215 | 3.514155  | 1.102204  |
| C      | -2.185572 | 4.122293  | 0.222757  |
| C      | -2.633471 | 3.432166  | -0.901815 |
| C      | -2.191123 | 2.149054  | -1.118122 |
| N      | -1.326355 | 1.578793  | -0.246436 |
| H      | -2.526997 | 5.132784  | 0.408567  |
| H      | -0.207597 | 1.666637  | 1.491816  |
| H      | -0.934421 | 4.021766  | 1.983959  |
| H      | -3.318921 | 3.878683  | -1.607585 |
| Cl     | -1.253501 | -0.393082 | 2.688612  |
| C      | -0.870114 | 0.223079  | -0.490600 |
| N      | -1.683528 | -0.739068 | -0.625819 |
| S      | -4.013050 | -1.687260 | -0.406569 |
| O      | -2.993842 | -0.365953 | -0.396145 |
| O      | -5.275137 | -1.080608 | -0.070136 |
| O      | -3.844399 | -2.369969 | -1.665106 |
| C      | -3.362928 | -2.643395 | 0.930493  |
| H      | -4.084862 | -3.438262 | 1.114151  |
| H      | -2.403238 | -3.044191 | 0.611007  |
| H      | -3.239610 | -1.978712 | 1.785724  |
| H      | -2.488757 | 1.545076  | -1.963379 |
| C      | 0.580783  | -0.000347 | -0.577136 |
| C      | 1.423989  | 0.991892  | -1.081252 |
| C      | 1.098257  | -1.229073 | -0.160097 |
| C      | 2.785969  | 0.749010  | -1.192934 |
| H      | 1.027037  | 1.947971  | -1.403492 |
| C      | 2.457201  | -1.476980 | -0.271709 |
| H      | 0.433445  | -1.968986 | 0.266484  |
| C      | 3.275463  | -0.481704 | -0.785798 |
| H      | 3.460665  | 1.494141  | -1.593733 |
| H      | 2.886304  | -2.419512 | 0.043066  |
| O      | 4.639246  | -0.749814 | -0.947428 |

|   |          |           |           |
|---|----------|-----------|-----------|
| C | 5.439560 | -0.418952 | 0.085073  |
| F | 5.112888 | -1.062235 | 1.209004  |
| F | 6.680360 | -0.743221 | -0.239793 |
| F | 5.401698 | 0.889021  | 0.358838  |

s13-ts-r

| Symbol | X         | Y         | Z         |
|--------|-----------|-----------|-----------|
| C      | 0.066421  | 2.204590  | 1.353437  |
| C      | 0.981335  | 2.677407  | 0.417605  |
| C      | 0.550684  | 2.864379  | -0.890498 |
| C      | -0.767927 | 2.560345  | -1.206850 |
| C      | -1.601728 | 2.081518  | -0.199784 |
| N      | -1.203220 | 1.909784  | 1.063321  |
| H      | 1.233015  | 3.229361  | -1.649449 |
| H      | 0.371030  | 2.048096  | 2.384336  |
| H      | 2.001478  | 2.890293  | 0.712598  |
| H      | -1.148989 | 2.682775  | -2.213013 |
| Cl     | -1.537652 | -1.270831 | 2.732754  |
| C      | -1.199140 | -1.156454 | 1.040739  |
| N      | -2.111096 | -1.225053 | 0.161199  |
| S      | -4.539039 | -1.174973 | -0.468967 |
| O      | -3.382678 | -1.387926 | 0.695432  |
| O      | -5.756669 | -1.416060 | 0.261737  |
| O      | -4.309585 | 0.094785  | -1.114364 |
| C      | -4.186958 | -2.504792 | -1.583410 |
| H      | -4.933059 | -2.447119 | -2.374509 |
| H      | -3.184098 | -2.355381 | -1.976940 |
| H      | -4.273364 | -3.435783 | -1.027614 |
| H      | -2.630112 | 1.811349  | -0.420397 |
| C      | 0.201463  | -0.941664 | 0.609284  |
| C      | 0.451504  | -0.630955 | -0.731857 |
| C      | 1.258399  | -1.000985 | 1.517653  |
| C      | 1.742179  | -0.362371 | -1.155787 |
| H      | -0.369969 | -0.576599 | -1.433864 |
| C      | 2.555220  | -0.730911 | 1.099483  |
| H      | 1.077831  | -1.245003 | 2.555614  |
| C      | 2.770736  | -0.402920 | -0.227211 |
| H      | 1.953358  | -0.104932 | -2.185990 |
| H      | 3.387326  | -0.766612 | 1.790764  |
| O      | 4.080054  | -0.144628 | -0.656994 |
| C      | 4.470730  | 1.141692  | -0.606734 |
| F      | 4.427061  | 1.642011  | 0.633452  |
| F      | 5.718236  | 1.210995  | -1.042077 |
| F      | 3.711781  | 1.938002  | -1.369699 |

s14Cl-ts  
 Symbol X Y Z  
 Cl 1.524512 -0.622936 -0.047705  
 C 0.000017 0.754749 0.433905  
 C 0.000067 1.912752 -0.230600  
 H 0.000013 2.823774 0.356779  
 H 0.000036 1.977982 -1.309703  
 H -0.000065 0.667476 1.508259  
 Cl -1.524567 -0.622732 -0.048309

s14Cl-ts-sgm  
 Symbol X Y Z  
 Cl 2.376451 -0.350255 0.000343  
 C 0.000067 0.099627 -0.001207  
 H 0.000036 -0.961895 -0.003953  
 C -0.001398 1.400130 -0.000103  
 H -0.938377 1.939708 0.001289  
 H 0.934696 1.941341 -0.000448  
 Cl -2.375767 -0.350786 0.000303

s14  
 Symbol X Y Z  
 Cl -1.060284 -0.099103 0.000147  
 C 0.577158 0.508337 0.000059  
 C 1.630057 -0.288581 0.000231  
 H 2.621385 0.147487 0.000066  
 H 1.537475 -1.367336 0.000273  
 H 0.616903 1.588452 -0.000092

s14-ts  
 Symbol X Y Z  
 C -0.876681 1.170512 -0.253807  
 C -2.236081 1.042119 -0.498418  
 C -2.859320 -0.157809 -0.182368  
 C -2.105974 -1.196457 0.359345  
 C -0.749141 -1.004887 0.547299  
 N -0.171754 0.159693 0.238316  
 H -3.921822 -0.283907 -0.349315  
 H -0.310603 2.081245 -0.426240  
 H -2.787523 1.873348 -0.916240  
 H -2.556774 -2.142265 0.627227  
 Cl 2.144186 -1.006341 -0.559413  
 C 1.526625 0.466433 0.592005

H -0.096803 -1.775672 0.939823  
 C 1.996232 1.708924 0.321823  
 H 2.373243 2.296497 1.147489  
 H 2.089433 2.091859 -0.685592  
 H 1.569997 0.072131 1.599309

s14-ts-sgm  
 Symbol X Y Z  
 C -1.374447 1.086534 -0.298108  
 C -2.754997 1.030701 -0.431543  
 C -3.398637 -0.174457 -0.174165  
 C -2.643701 -1.279156 0.202630  
 C -1.266869 -1.135800 0.307972  
 N -0.656704 0.024604 0.067895  
 H -4.474790 -0.252217 -0.268256  
 H -0.821795 2.000814 -0.489305  
 H -3.304743 1.912131 -0.733501  
 H -3.105462 -2.234616 0.412656  
 Cl 3.692818 -0.368290 -0.359770  
 C 1.444794 0.074839 0.142448  
 H -0.630553 -1.966955 0.595207  
 H 1.332111 -0.779483 -0.481214  
 C 1.574860 1.084786 0.961840  
 H 0.704752 1.565735 1.388542  
 H 2.556821 1.450258 1.224325

s15  
 Symbol X Y Z  
 C -0.274604 0.456479 0.000038  
 C -1.455744 1.372844 -0.000054  
 H -1.117892 2.409498 0.000935  
 H -2.075638 1.202435 -0.883028  
 H -2.076842 1.201133 0.881807  
 Cl -0.731562 -1.252513 -0.000212  
 C 1.004169 0.813551 0.000097  
 C 2.212478 -0.067437 -0.000013  
 H 2.829783 0.138183 0.878189  
 H 1.948903 -1.123624 0.000694  
 H 2.828910 0.137196 -0.879066  
 H 1.181313 1.886498 0.000225

s15-ts  
 Symbol X Y Z  
 C -1.165988 1.141141 0.240906

|    |           |           |           |    |           |           |           |
|----|-----------|-----------|-----------|----|-----------|-----------|-----------|
| C  | -2.537776 | 1.233213  | 0.053502  | Cl | -0.378299 | -1.611662 | 1.594520  |
| C  | -3.254374 | 0.069247  | -0.193109 | C  | -0.523849 | -0.564392 | -0.013666 |
| C  | -2.577234 | -1.144838 | -0.248198 | H  | 1.929716  | -1.864440 | 0.398846  |
| C  | -1.202627 | -1.150532 | -0.071049 | C  | -1.443678 | 0.449814  | 0.009286  |
| N  | -0.529178 | -0.022707 | 0.164525  | Cl | -0.584739 | -1.652052 | -1.387132 |
| H  | -4.327268 | 0.105108  | -0.336565 | Cl | -1.579961 | 1.433725  | 1.439996  |
| H  | -0.536122 | 1.997117  | 0.465154  | Cl | -2.676898 | 0.700096  | -1.186404 |
| H  | -3.024908 | 2.197398  | 0.107887  |    |           |           |           |
| H  | -3.098168 | -2.075096 | -0.430529 |    |           |           |           |
| Cl | 1.771874  | -1.319360 | -0.890030 |    |           |           |           |
| C  | 1.366174  | -0.688539 | 1.894171  |    |           |           |           |
| H  | 2.395168  | -0.997898 | 2.081426  |    |           |           |           |
| H  | 1.016832  | -0.057329 | 2.714661  |    |           |           |           |
| H  | 0.747550  | -1.583626 | 1.858914  |    |           |           |           |
| C  | 1.300444  | 0.081697  | 0.613193  |    |           |           |           |
| H  | -0.614502 | -2.057914 | -0.123631 |    |           |           |           |
| C  | 1.797400  | 1.299699  | 0.383589  |    |           |           |           |
| C  | 1.808551  | 1.985161  | -0.952546 |    |           |           |           |
| H  | 1.688317  | 3.066574  | -0.852458 |    |           |           |           |
| H  | 2.746205  | 1.805098  | -1.490390 |    |           |           |           |
| H  | 1.000893  | 1.611682  | -1.587604 |    |           |           |           |
| H  | 2.323811  | 1.743580  | 1.223420  |    |           |           |           |

s16

| Symbol | X         | Y         | Z         |
|--------|-----------|-----------|-----------|
| Cl     | 1.589238  | -1.450033 | -0.000194 |
| C      | 0.667964  | 0.000311  | 0.000193  |
| C      | -0.667921 | -0.000411 | 0.000214  |
| Cl     | 1.588676  | 1.450242  | -0.000195 |
| Cl     | -1.589162 | -1.450053 | -0.000205 |
| Cl     | -1.588703 | 1.450212  | -0.000204 |

s16-ts

| Symbol | X        | Y         | Z         |
|--------|----------|-----------|-----------|
| C      | 1.290041 | 1.255917  | -0.391570 |
| C      | 2.561267 | 1.791352  | -0.518065 |
| C      | 3.657981 | 0.967381  | -0.305632 |
| C      | 3.453786 | -0.370319 | 0.021898  |
| C      | 2.159863 | -0.838081 | 0.146616  |
| N      | 1.118423 | -0.019784 | -0.050967 |
| H      | 4.663137 | 1.358241  | -0.401654 |
| H      | 0.378840 | 1.817186  | -0.567010 |
| H      | 2.675941 | 2.833083  | -0.783302 |
| H      | 4.281473 | -1.047747 | 0.180123  |
